# Supplementary material for: Synthesis of a trinuclear zinc(ii) cluster composed of [4.4.3.01,5]tridecane cages: a rapid detection and degradation probe for the chemical warfare agent simulant diethyl cyanophosphonate in protein-rich food products
Source: Royal Society of Chemistry journal article supplement (doi:10.1039/d3an00469d), 2023-01-01
Supplement: d3an00469d1.pdf [file d3an00469d1.pdf]

Supplementary information

**Synthesis of trinuclear Zinc(II) cluster composed of [4.4.3.0<sup>1,5</sup>]tridecane cages: A rapid detection and degradation probe for chemical warfare agent simulant diethyl cyanophosphonate in protein-rich food products**

*Sahil Thakur<sup>a</sup>, Jyoti Rohilla<sup>a</sup>, Keshav Kumar<sup>a</sup>, Harender Kumar<sup>c</sup>, Raghubir Singh<sup>b\*</sup>, Varinder Kau<sup>a\*</sup>, Raman Kamboj<sup>b</sup>, Ravneet Kaur<sup>c</sup>*

*<sup>a</sup>Department of Chemistry, Panjab University, Sector-14, Chandigarh-160014, India*

*<sup>b</sup>Department of Chemistry, DAV College, Sector 10, Chandigarh-160011, India*

*<sup>c</sup>Department of Zoology, Panjab University, Sector-14, Chandigarh-160014, India*

\*Corresponding author: [var\\_ka04@yahoo.co.in](mailto:var_ka04@yahoo.co.in) (V.K.), [raghubirsingh@davchd.ac.in](mailto:raghubirsingh@davchd.ac.in) (R.S.)

| <b>List of Figures</b> |                                                                                                       |           |
|------------------------|-------------------------------------------------------------------------------------------------------|-----------|
| <b>ES 1</b>            | Synthesis of Schiff base (SB)                                                                         | <b>4</b>  |
| <b>Figure S1</b>       | FT-IR spectrum of ligand Schiff base (SB)                                                             | <b>5</b>  |
| <b>Figure S2</b>       | <sup>1</sup> H-NMR spectrum (500 MHz, CDCl <sub>3</sub> ) of Schiff base (SB)                         | <b>6</b>  |
| <b>Figure S3</b>       | <sup>13</sup> C-NMR spectrum (125 MHz, CDCl <sub>3</sub> ) of Schiff base (SB)                        | <b>7</b>  |
| <b>Figure S4</b>       | ESI-MS spectrum of Schiff base (SB)                                                                   | <b>8</b>  |
| <b>Figure S5</b>       | FT-IR spectrum of reduced Schiff base (rSB)                                                           | <b>9</b>  |
| <b>Figure S6</b>       | <sup>1</sup> H-NMR spectrum (500 MHz, DMSO-d <sub>6</sub> ) of reduced Schiff base (rSB)              | <b>10</b> |
| <b>Figure S7</b>       | <sup>13</sup> C-NMR spectrum (125 MHz, DMSO-d <sub>6</sub> ) of reduced Schiff base (rSB)             | <b>11</b> |
| <b>Figure S8</b>       | ESI-MS spectrum of reduced Schiff base (rSB)                                                          | <b>12</b> |
| <b>Figure S9</b>       | FT-IR spectrum of tripodal amine (TPA)                                                                | <b>13</b> |
| <b>Figure S10</b>      | <sup>1</sup> H-NMR spectrum (500 MHz, CDCl <sub>3</sub> ) of tripodal amine (TPA)                     | <b>14</b> |
| <b>Figure S11</b>      | <sup>13</sup> C-NMR spectrum (125 MHz, CDCl <sub>3</sub> ) of tripodal amine (TPA)                    | <b>15</b> |
| <b>Figure S12</b>      | ESI-MS spectrum of tripodal amine (TPA)                                                               | <b>16</b> |
| <b>Figure S13</b>      | FT-IR spectrum of compartmental ligand (H <sub>3</sub> L)                                             | <b>17</b> |
| <b>Figure S14</b>      | <sup>1</sup> H-NMR spectrum (500 MHz, CDCl <sub>3</sub> ) of compartmental ligand (H <sub>3</sub> L)  | <b>18</b> |
| <b>Figure S15</b>      | <sup>13</sup> C-NMR spectrum (125 MHz, CDCl <sub>3</sub> ) of compartmental ligand (H <sub>3</sub> L) | <b>19</b> |
| <b>Figure S16</b>      | ESI-MS spectrum of compartmental ligand (H <sub>3</sub> L)                                            | <b>20</b> |
| <b>Figure S17</b>      | FT-IR spectrum of trinuclear Zinc(II) cluster                                                         | <b>21</b> |
| <b>Figure S18</b>      | <sup>1</sup> H-NMR spectrum (500 MHz, CD <sub>3</sub> OD) trinuclear Zinc(II) cluster                 | <b>22</b> |
| <b>Figure S19</b>      | <sup>13</sup> C-NMR spectrum (125 MHz, CD <sub>3</sub> OD) trinuclear Zinc(II) cluster                | <b>23</b> |
| <b>Figure S20</b>      | ESI-MS spectrum of trinuclear Zinc(II) cluster                                                        | <b>24</b> |
| <b>Figure S21</b>      | UV-Visible spectrum of trinuclear Zinc(II) cluster                                                    | <b>25</b> |
| <b>Figure S22</b>      | Fluorescence response of the trinuclear Zinc(II) cluster                                              | <b>26</b> |
| <b>Figure S23</b>      | Solvent selection scan of trinuclear Zinc(II) cluster                                                 | <b>27</b> |

|                   |                                                                                                                                               |              |
|-------------------|-----------------------------------------------------------------------------------------------------------------------------------------------|--------------|
| <b>Figure S24</b> | Stern Volmer Plot                                                                                                                             | <b>28</b>    |
| <b>Figure S25</b> | Effect of pH on the fluorescence intensity of trinuclear Zinc(II) cluster (black line) and its complex with DCNP (red line).                  | <b>29</b>    |
| <b>Figure S26</b> | Job plot for the interaction between trinuclear Zinc(II) cluster and DCNP.                                                                    | <b>30</b>    |
| <b>Figure S27</b> | <sup>31</sup> P NMR titration of DCNP and trinuclear Zinc(II) cluster (PROBE) in 1:1 and 1:2 stoichiometry in MeOH-d <sup>4</sup> .           | <b>31</b>    |
| <b>Figure S28</b> | <sup>1</sup> H NMR titration of DCNP and trinuclear Zinc(II) cluster (PROBE) in 1:1 and 1:2 stoichiometry at 500 MHz in MeOH-d <sup>4</sup> . | <b>32</b>    |
| <b>Figure S29</b> | MS (m/z) of hydrolyzed product formed after the addition of DCNP to trinuclear Zinc(II) cluster                                               | <b>33</b>    |
| <b>Figure S30</b> | MS (m/z) showing hydrolyzed product formed after the addition of DCNP to trinuclear Zinc(II) cluster                                          | <b>34</b>    |
| <b>Figure S31</b> | MS (m/z) showing the hydrolyzed product with HCN coordinated to the trinuclear Zinc(II) cluster                                               | <b>35</b>    |
| <b>Figure S32</b> | Optimized structures of trinuclear Zinc(II) cluster–DCNP conjugate using B3LYP/ LanL2DZ on Zn, Br, P and 6-31+G (d,p) on C, H, N, O           | <b>36</b>    |
| <b>Figure S33</b> | Comparison of emission intensity of the trinuclear Zinc(II) cluster in the presence of various bio-relevant amino acids.                      | <b>37</b>    |
| <b>Table S1</b>   | Crystallographic data and structural parameters for trinuclear Zinc(II) cluster                                                               | <b>38</b>    |
| <b>Table S2</b>   | Bonding parameters for trinuclear Zinc(II) cluster                                                                                            | <b>38</b>    |
| <b>Table S3</b>   | Readings of the emission measurements of trinuclear Zinc(II) cluster in the absence of analyte.                                               | <b>39</b>    |
| <b>Table S4</b>   | Different compounds and corresponding methods for DCNP detection                                                                              | <b>39</b>    |
| <b>Table S5</b>   | Calculated coordinates of trinuclear Zinc(II) cluster using B3LYP/ LanL2DZ on Zn, Br and 6-31+G (d,p) on C,H,N,O.                             | <b>39-42</b> |
| <b>Table S6</b>   | Calculated coordinates of trinuclear Zinc(II) cluster-DCNP using B3LYP/ LanL2DZ on Zn, Br, P and 6-31+G (d,p) on C, H, N.                     | <b>42-46</b> |

### ES.1 Synthesis of Schiff base (SB)

In a single-neck round bottom flask, ethanolamine (24.55 mmol, 1.50 g) was added to 5-bromosalicylaldehyde (24.55 mmol, 4.93 g) dissolved in 100 mL methanol. The reaction mixture was heated to reflux for 24 h and the contents were cooled to room temperature. The solvent was removed under a vacuum to afford a yellow solid. The product was filtered, washed with hexane and diethyl ether to remove the impurities, dried and stored under dry conditions. Yield: 90.80% (22.24 mmol, 5.43 g), Melting point: 90-92°C; FT-IR (KBr)  $\text{cm}^{-1}$ : 3300-2950 (br, OH, intramolecular hydrogen-bonded), 1646 (C=N), 1497(C-C), 1079, 1015 (C-O), 726 (C-Br).  $^1\text{H-NMR}$  (500 MHz,  $\text{CDCl}_3$ ):  $\delta$  (ppm) 1.63 (1H, s, Alk-OH), 3.69 (2H, t,  $^3J = 5.0$  Hz, H<sup>9</sup>), 3.85 (2H, t,  $^3J = 5.0$  Hz, H<sup>8</sup>), 6.78 (1H, d,  $^3J = 8.5$  Hz, H<sup>2</sup>), 7.30 (2H, dd, H<sup>3</sup>), 7.32 (2H, d, H<sup>5</sup>), 8.24 (1H, s, H<sup>7</sup>), 13.22 (1H, s, Ar-OH);  $^{13}\text{C NMR}$  (125 MHz,  $\text{CDCl}_3$ ):  $\delta$  (ppm) 61.6 (C<sup>9</sup>), 61.9 (C<sup>8</sup>), 110.1 (C<sup>4</sup>), 119.1 (C<sup>2</sup>), 120.0 (C<sup>6</sup>), 133.6 (C<sup>5</sup>), 135.1 (C<sup>3</sup>), 160.3 (C<sup>7</sup>), 165.7 (C<sup>1</sup>); ESI-MS (m/z): 244.36 (M+H)<sup>+</sup>, 246.36 (M+2+H)<sup>+</sup>. Anal. Calcd for  $\text{C}_9\text{H}_{10}\text{NO}_2\text{Br}$  C, 44.29; H, 4.13; N, 5.74; Found: C, 44.28; H, 4.12; N, 5.76.

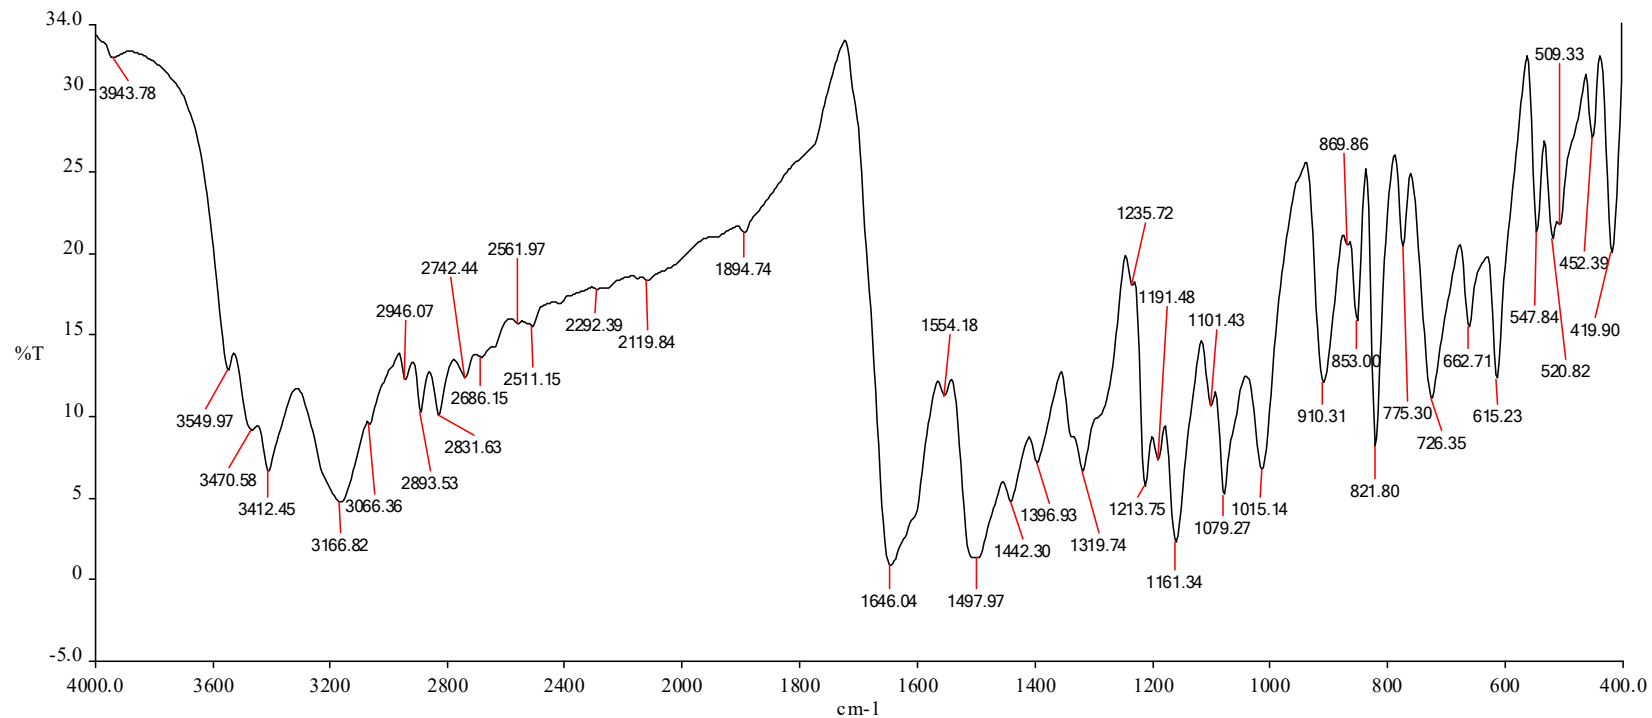

ROHILLA JYOTI 1.asc - 01/18/2022 - SB IR

**Figure S1** FT-IR spectrum of Schiff base (SB)

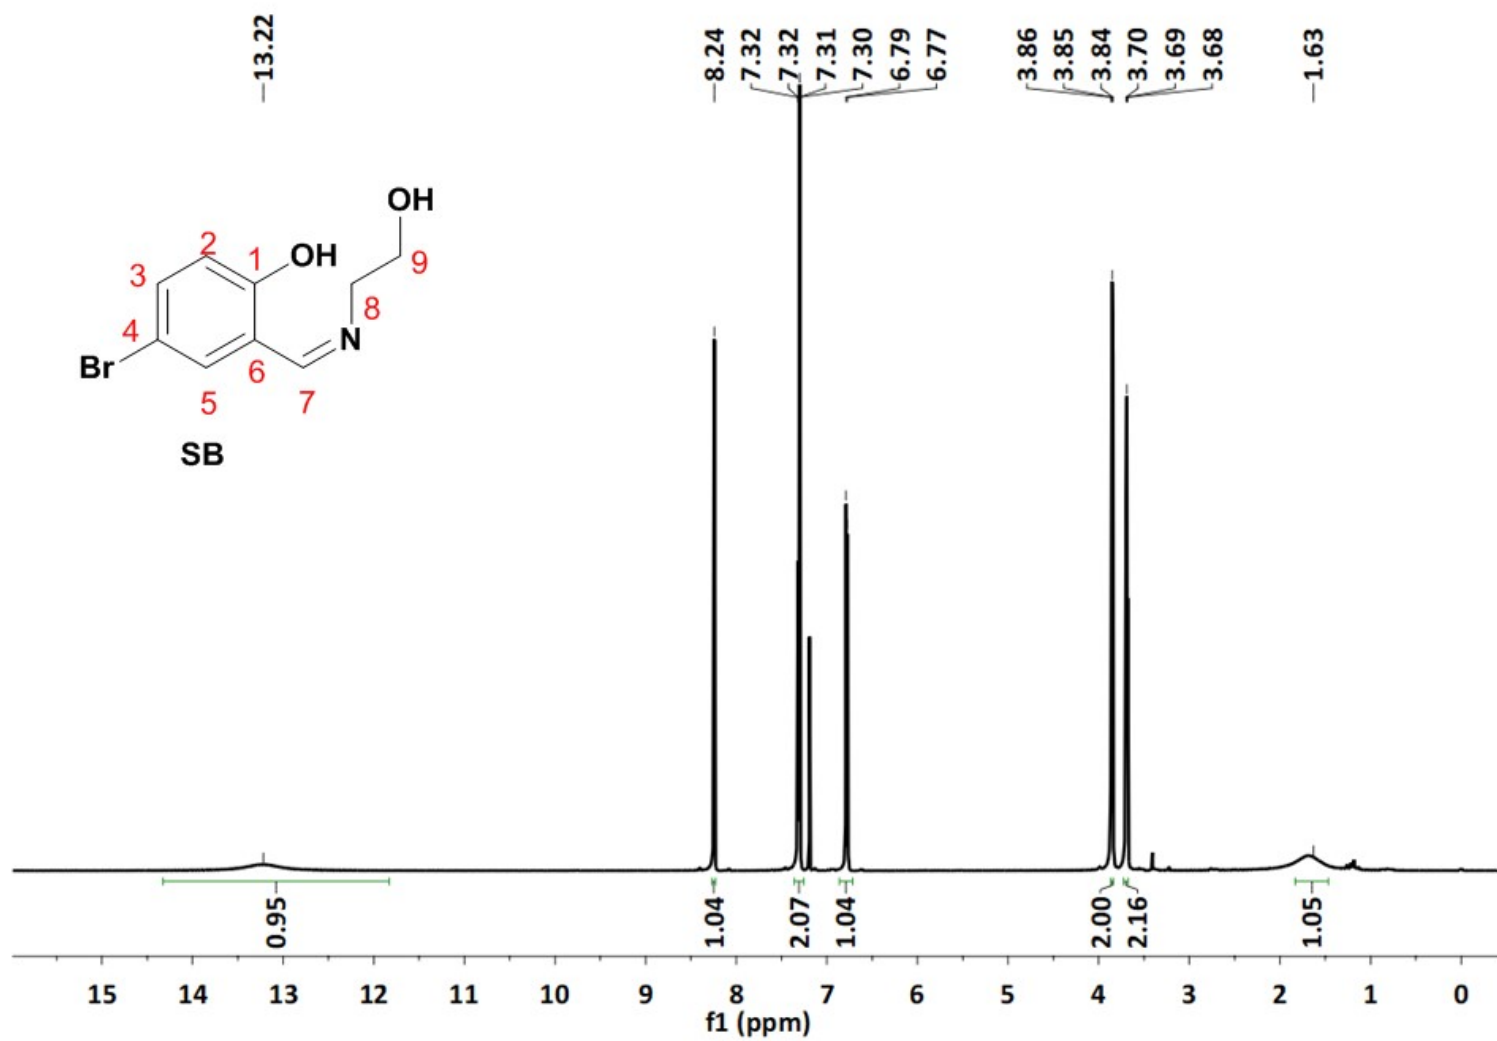

Figure S2 <sup>1</sup>H-NMR spectrum (500 MHz, CDCl<sub>3</sub>) Schiff Base (SB).

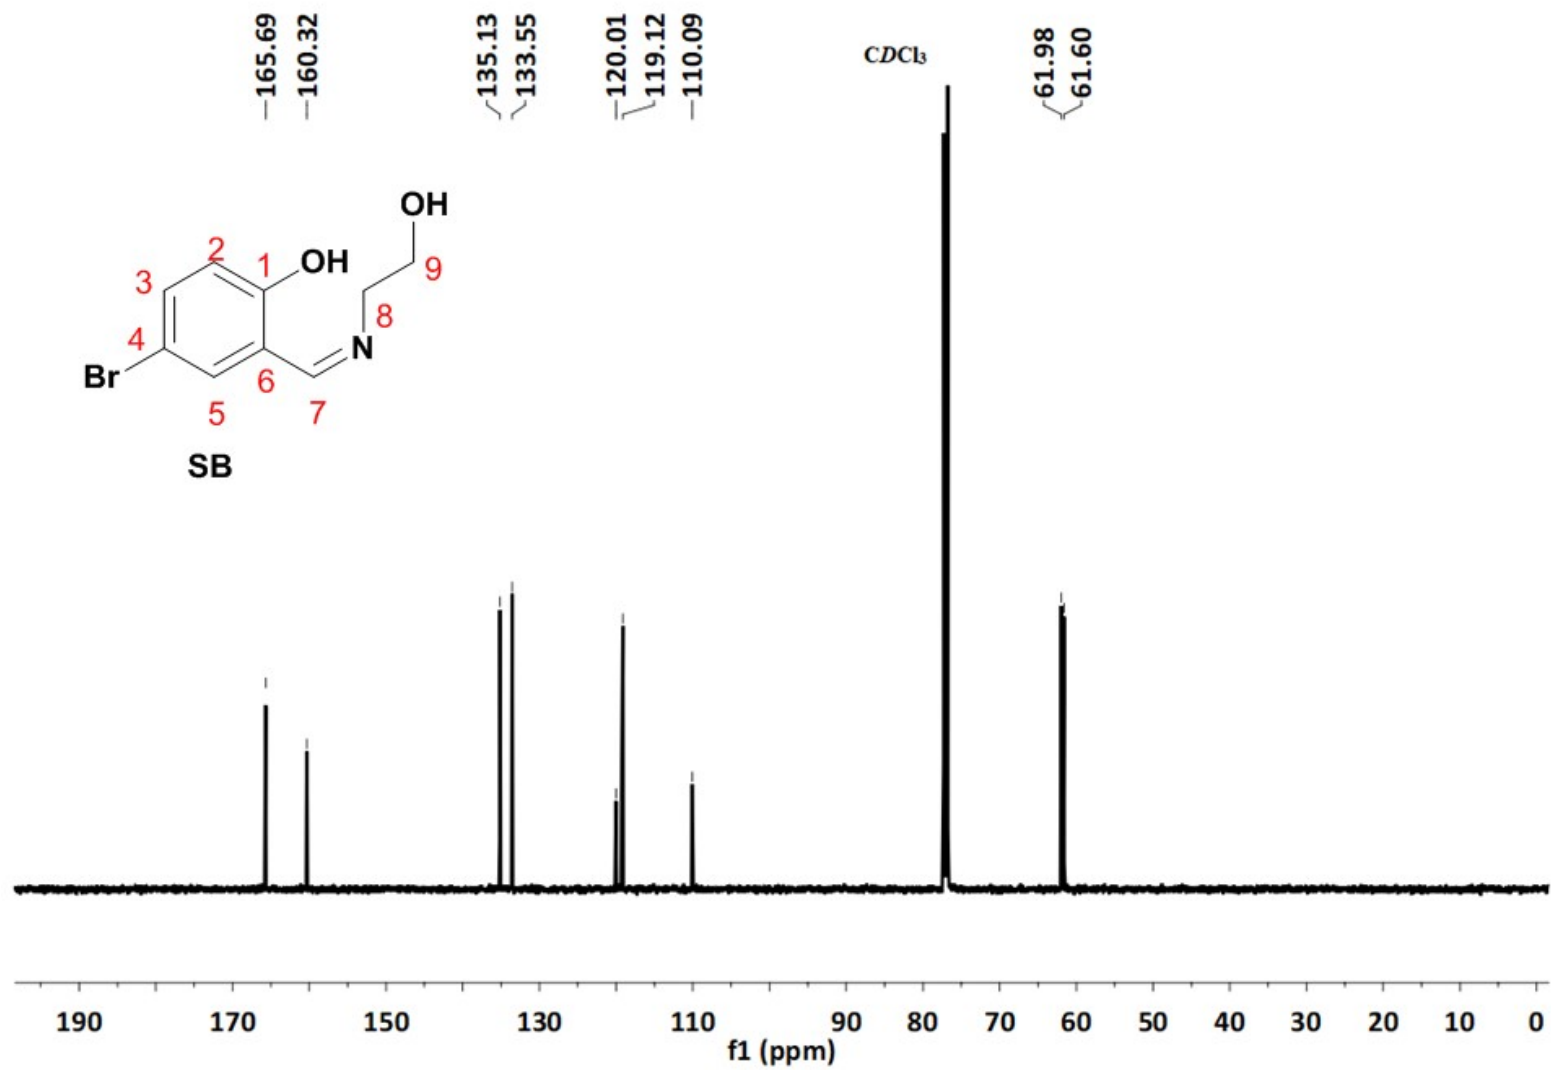

Figure S3 <sup>13</sup>C-NMR spectrum (125 MHz, CDCl<sub>3</sub>) Schiff Base (SB).

**WATERS,Q-TOF MICROMASS (ESI-MS)**

JYOTI SB 35 (0.533) Sm (SG, 2x3.00); Cm (16:47)

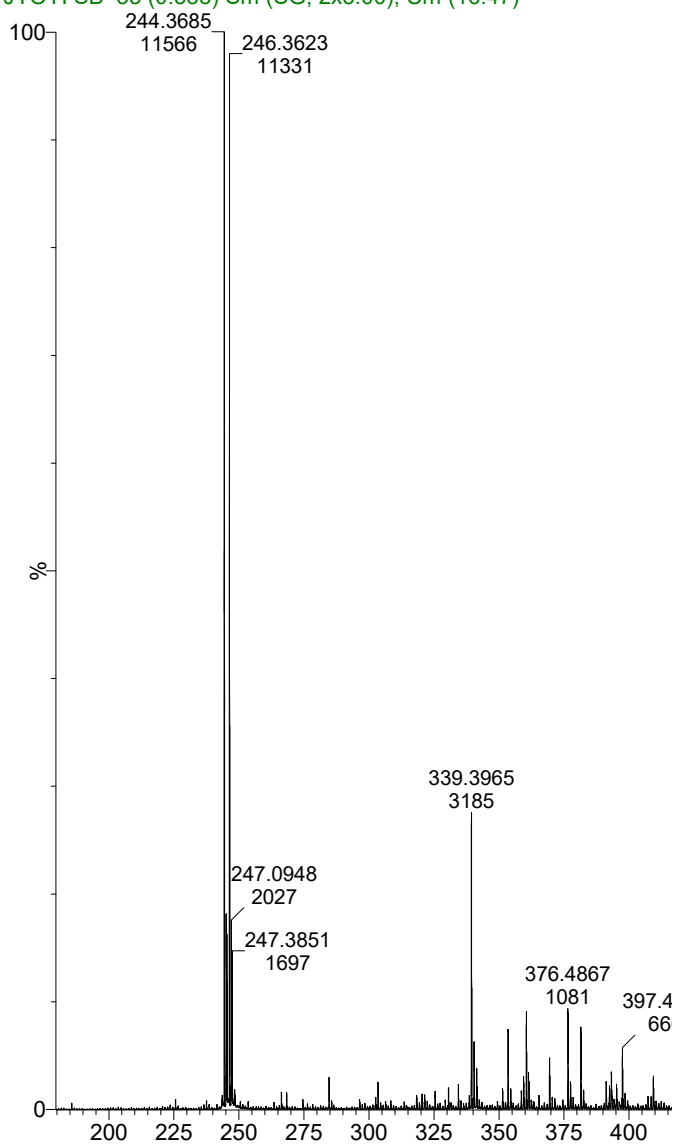

**Figure S4** ESI-MS spectrum of Schiff base (SB).



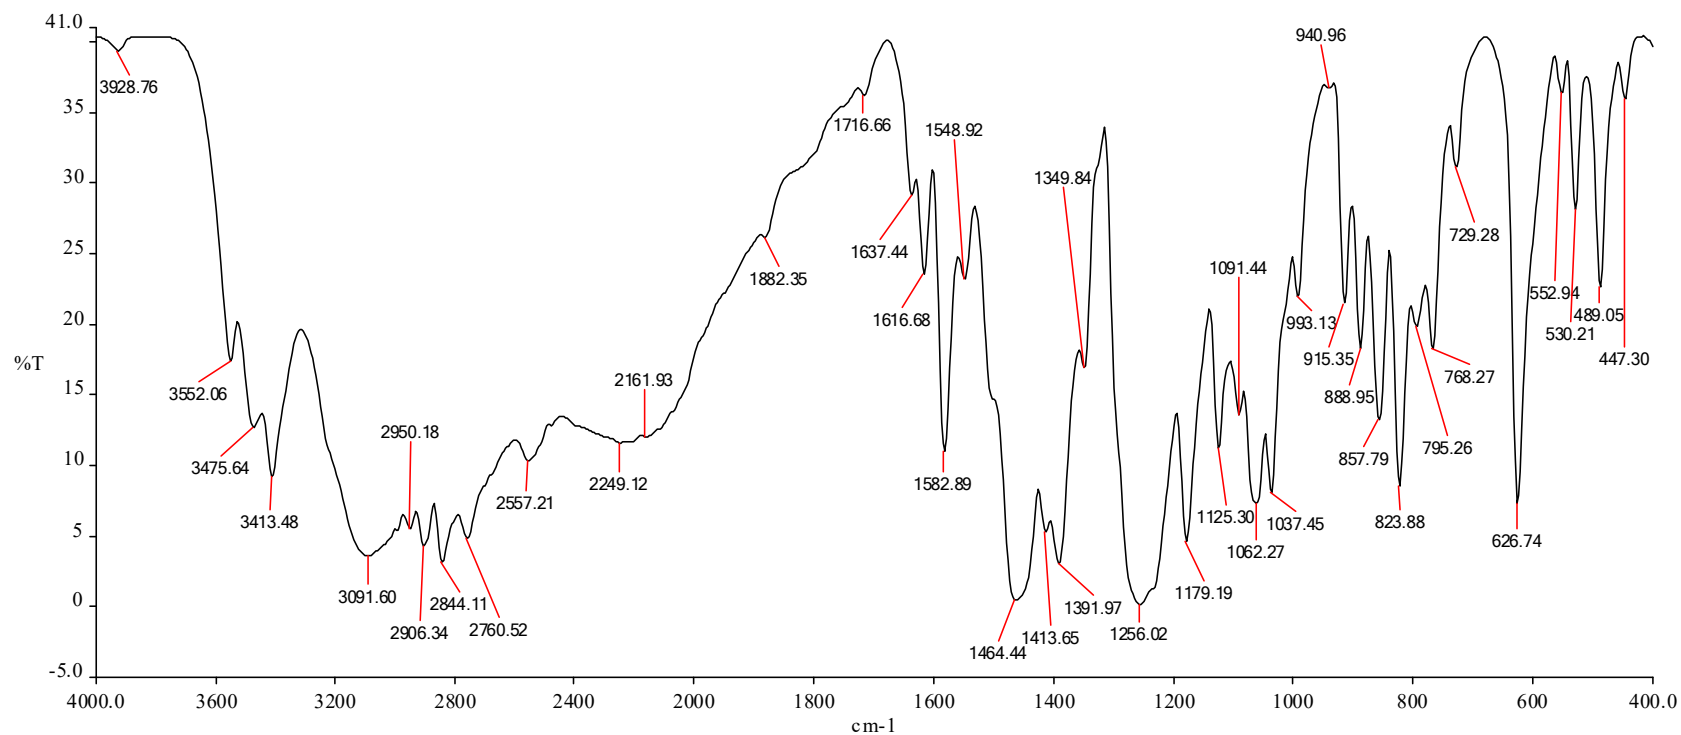

ROHILLA JYOTI 3.asc - 01/18/2022 - RSB IR

**Figure S5** FT-IR spectrum of reduced Schiff base (rSB)

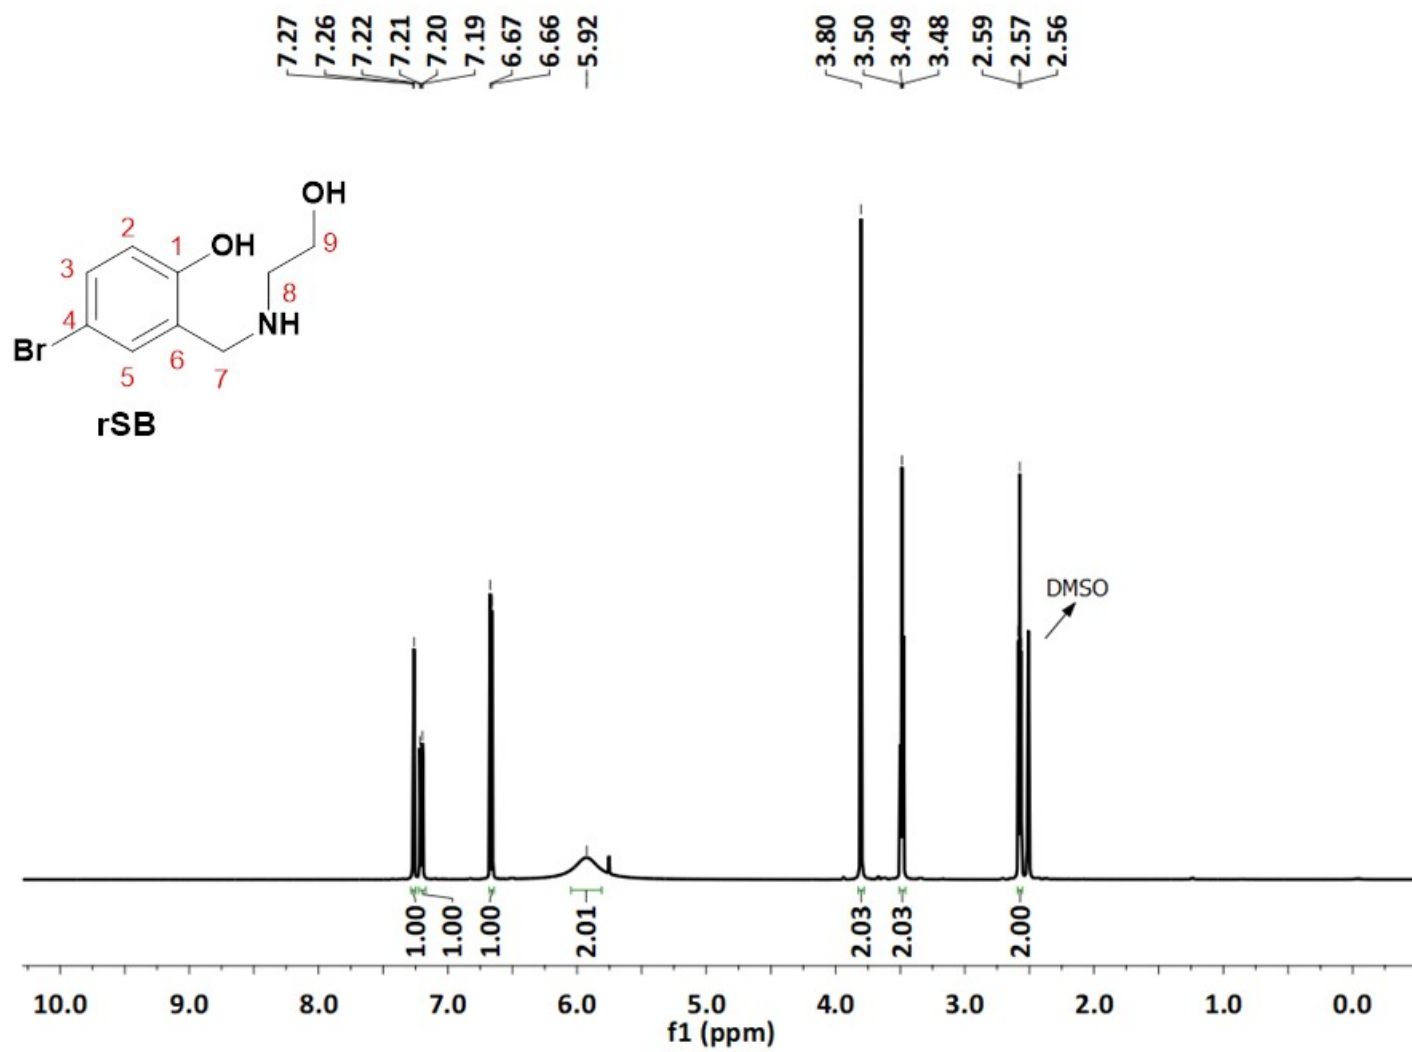

**Figure S6** <sup>1</sup>H-NMR spectrum (500 MHz, DMSO) of reduced Schiff Base (rSB).

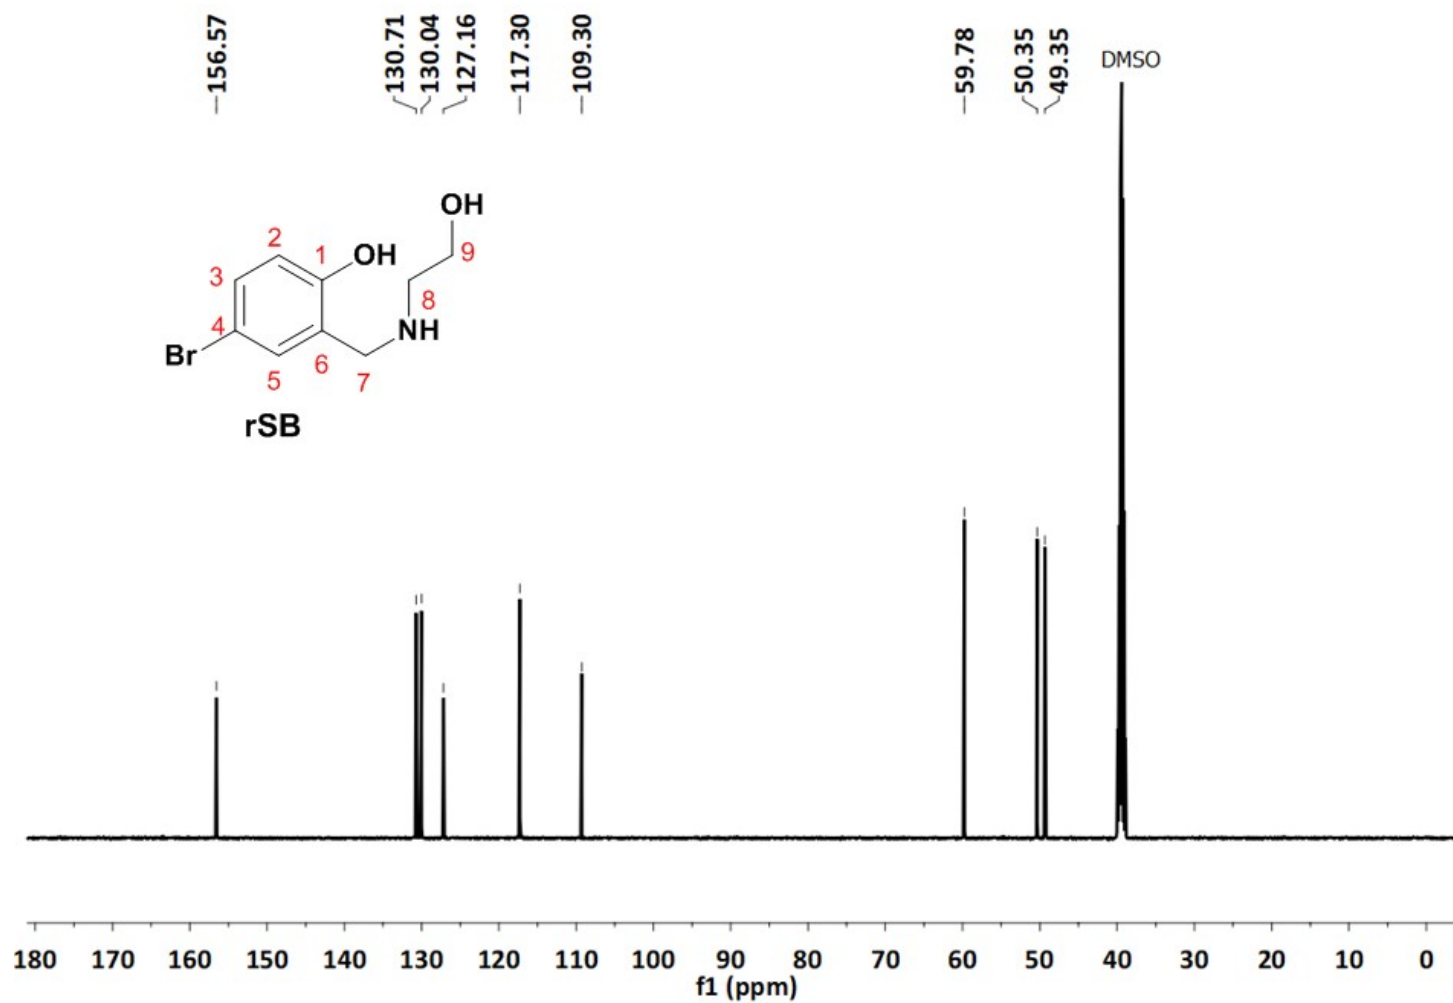

Figure S7 <sup>13</sup>C-NMR spectrum (125 MHz, DMSO) of reduced Schiff Base (rSB).

**WATERS, Q-TOF MICROMASS (ESI-MS)**

JYOTI RSB 40 (0.608) Sm (SG, 2x3.00); Cm (31:50)

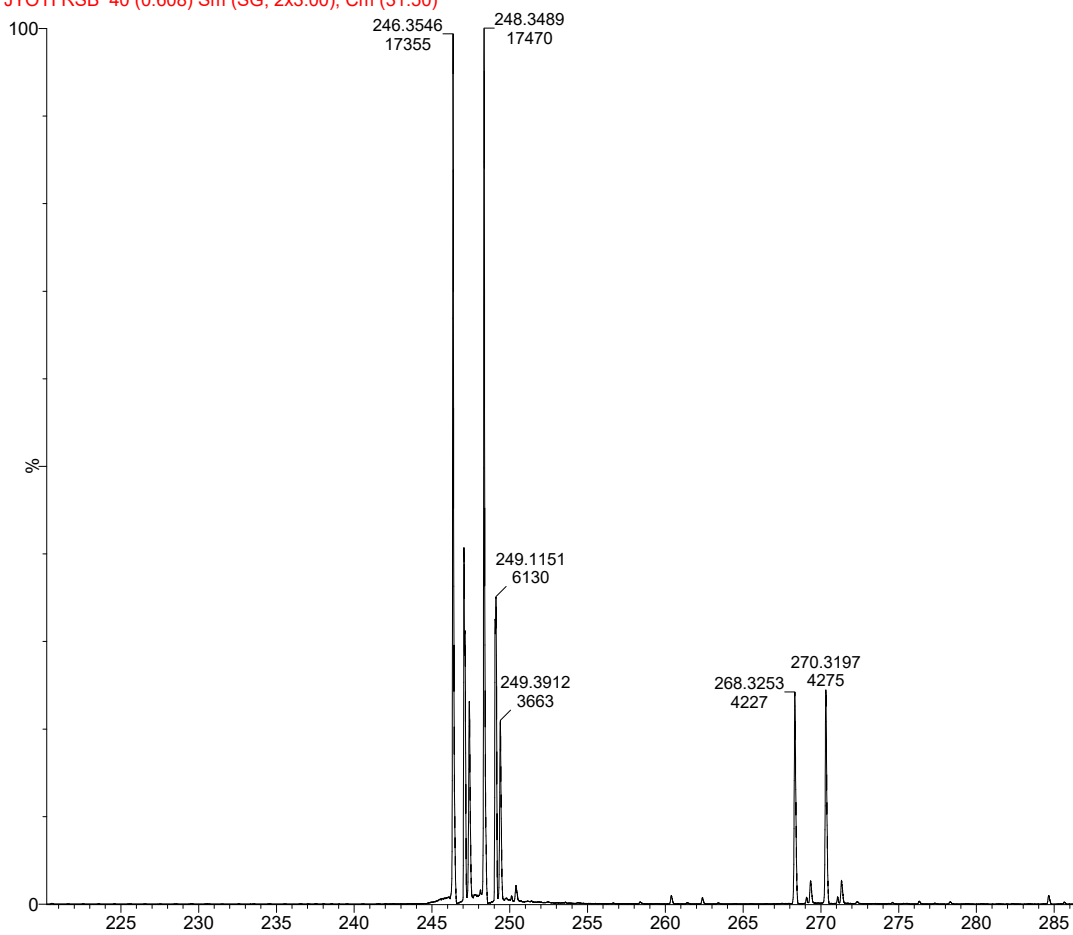

**Figure S8** ESI-MS spectrum of reduced Schiff Base (rSB).

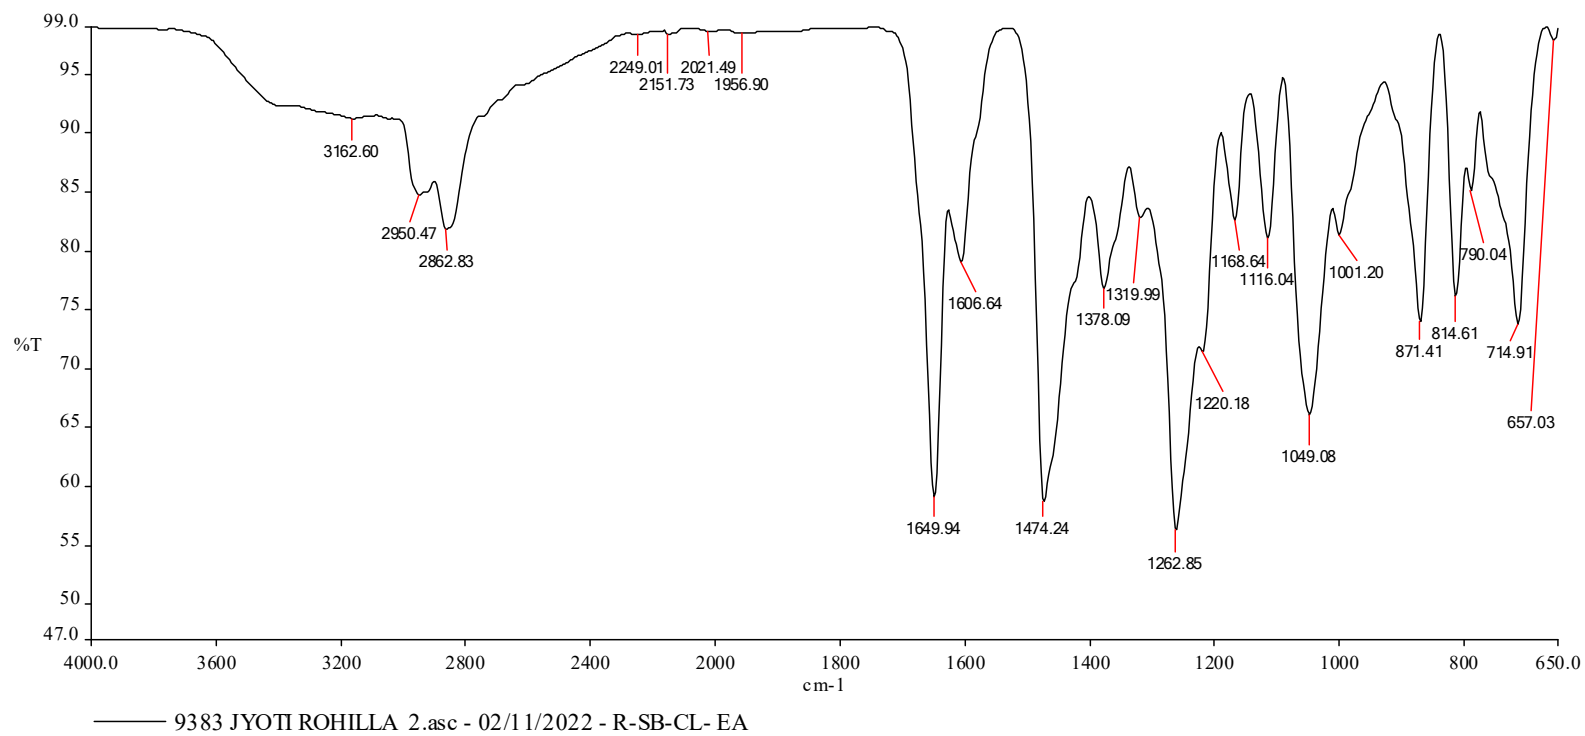

Figure S9 FT-IR spectrum of tripodal amine (TPA).

Fig

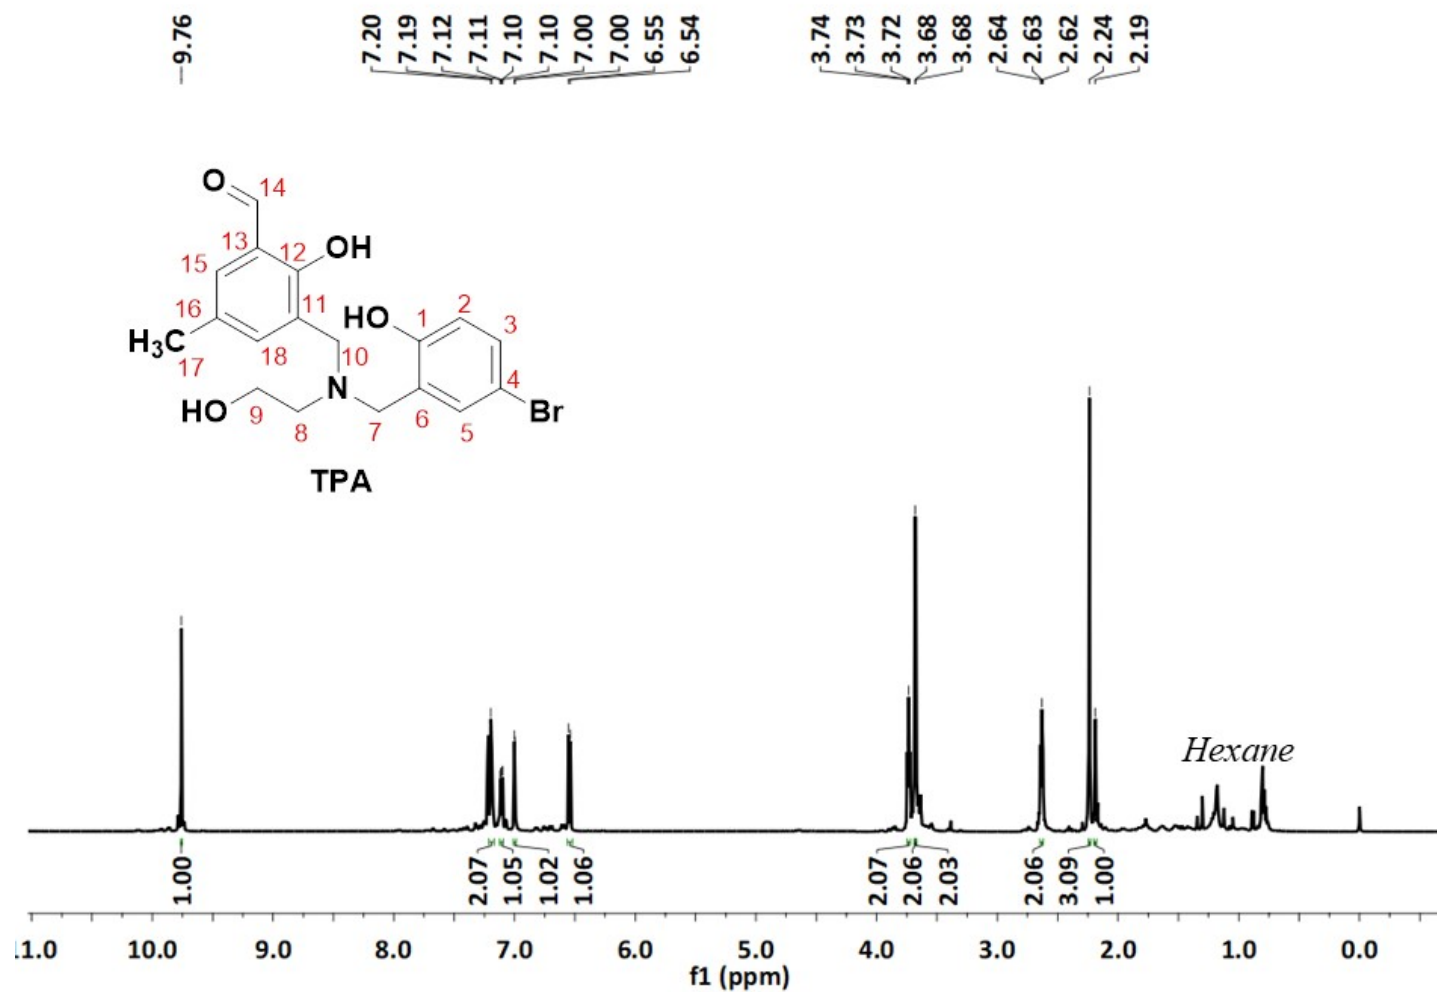

Figure S10 <sup>1</sup>H-NMR spectrum (500 MHz, CDCl<sub>3</sub>) of tripodal amine (TPA).

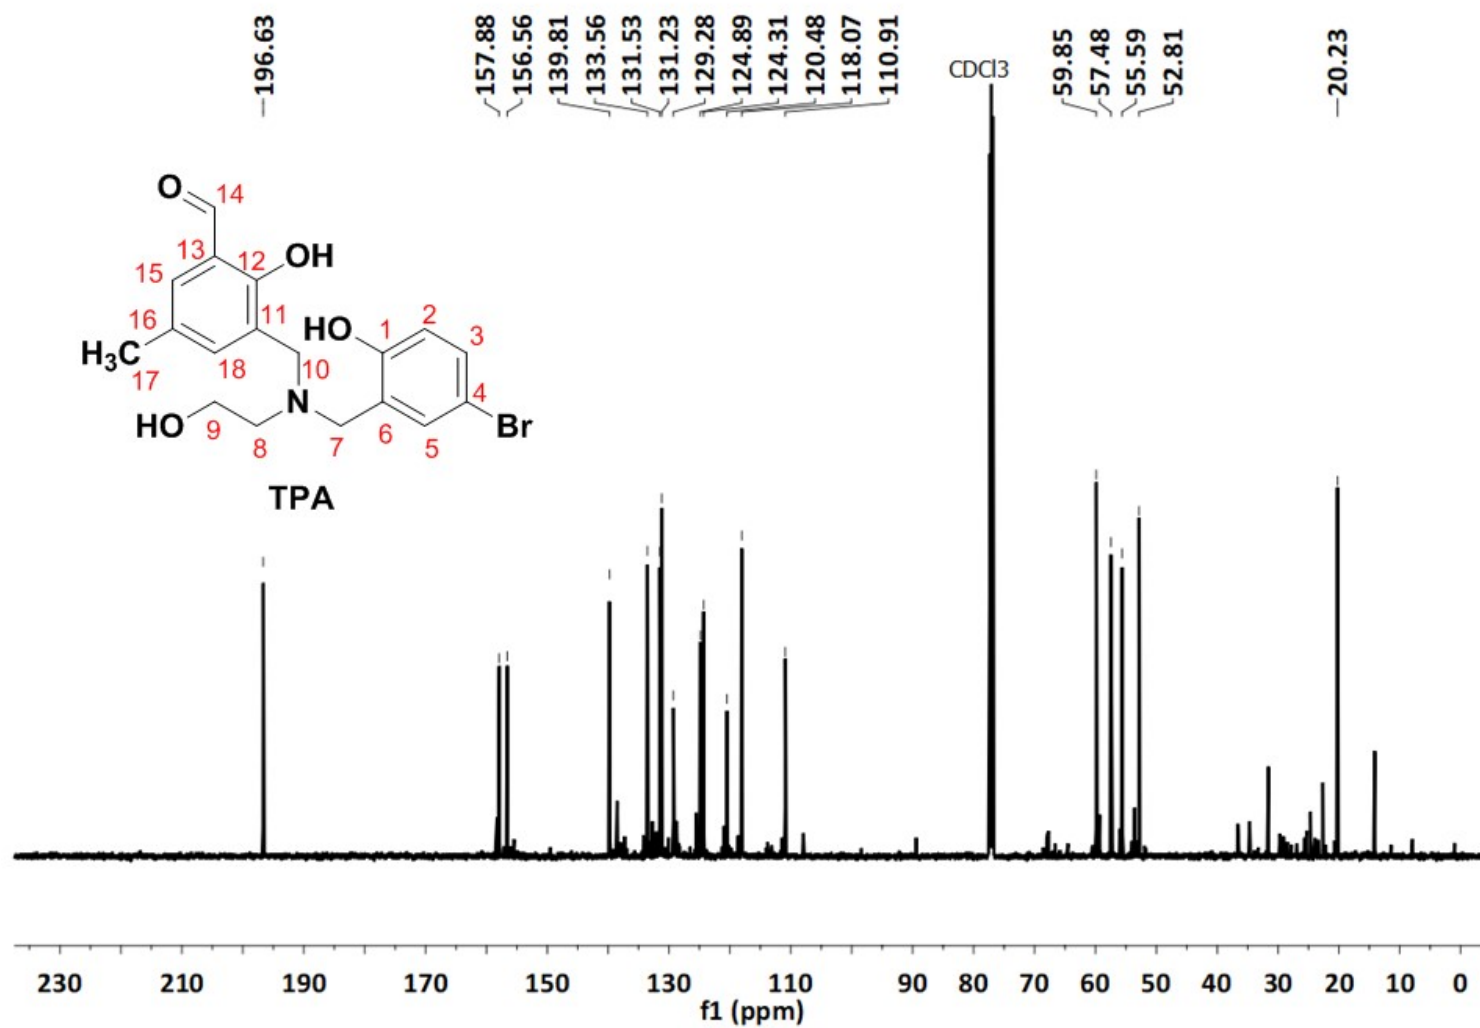

**Figure S11** <sup>13</sup>C-NMR spectrum (125 MHz, CDCl<sub>3</sub>) of tripodal amine (TPA).

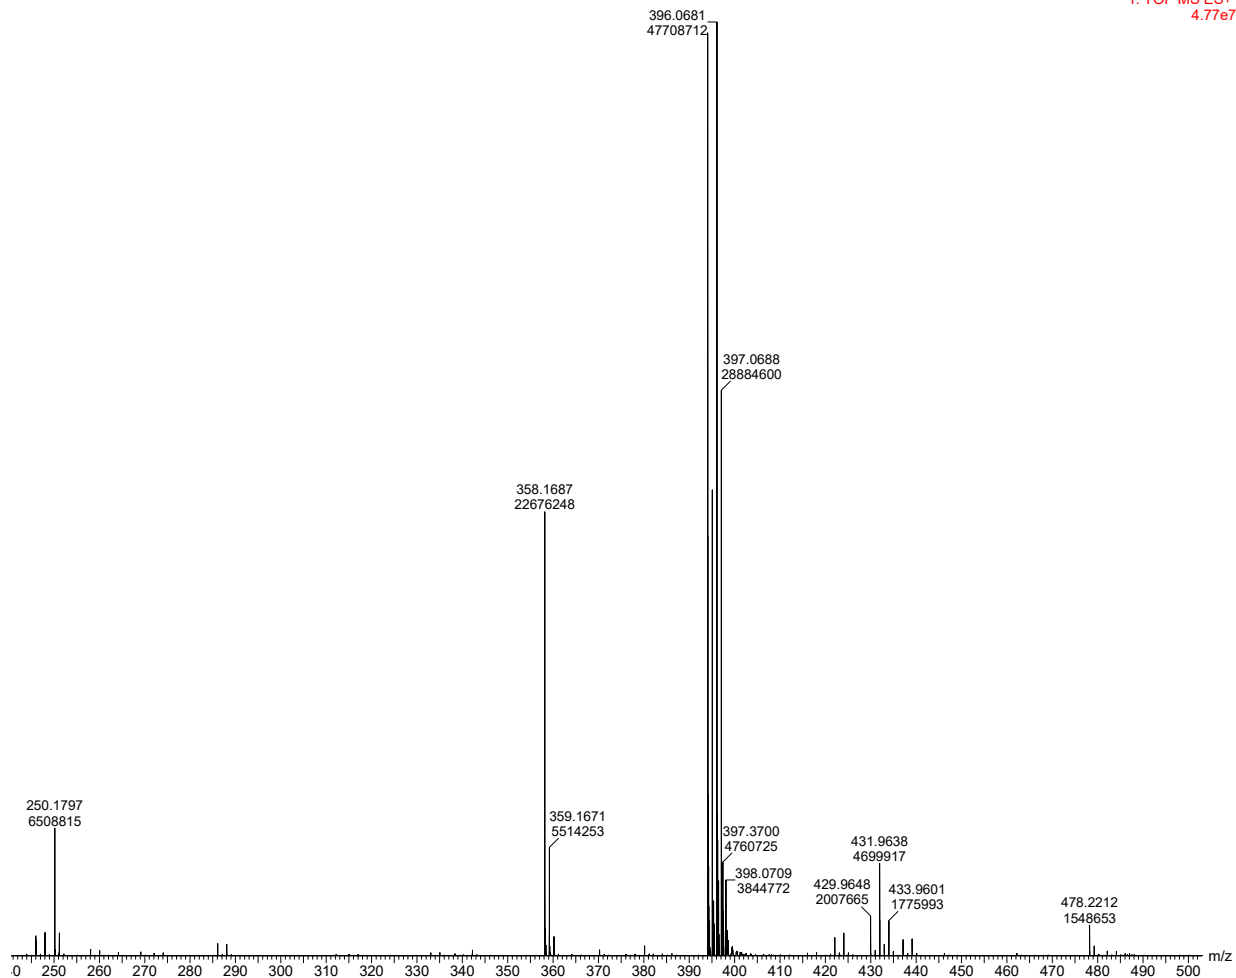

**Figure S12** ESI-MS spectrum of tripodal amine (TPA).



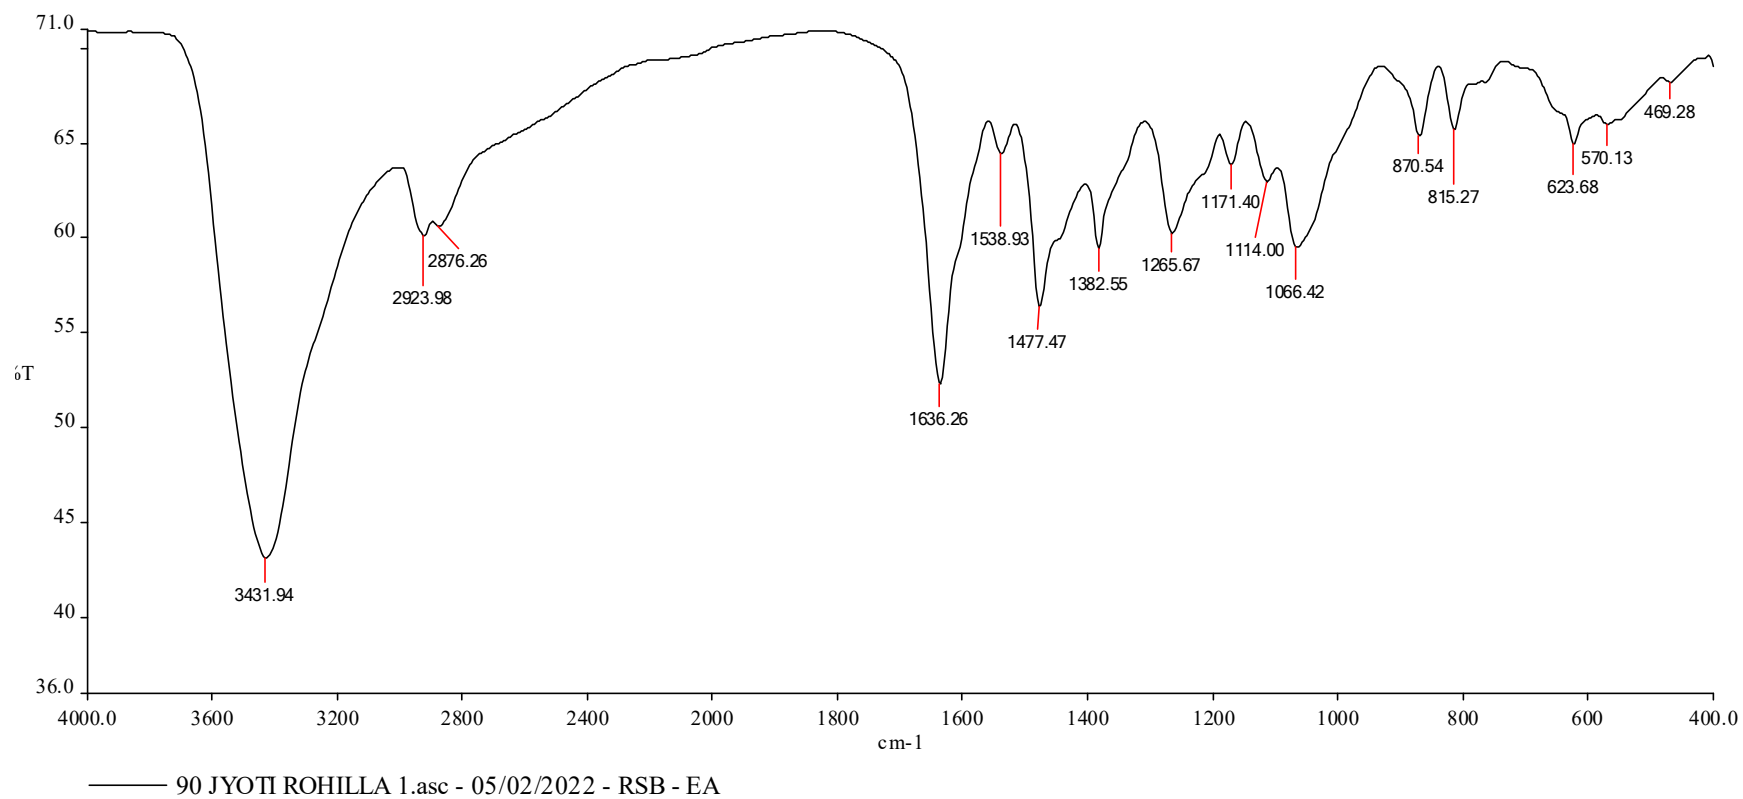

**Figure S13** FT-IR spectrum of compartmental ligand H<sub>3</sub>L

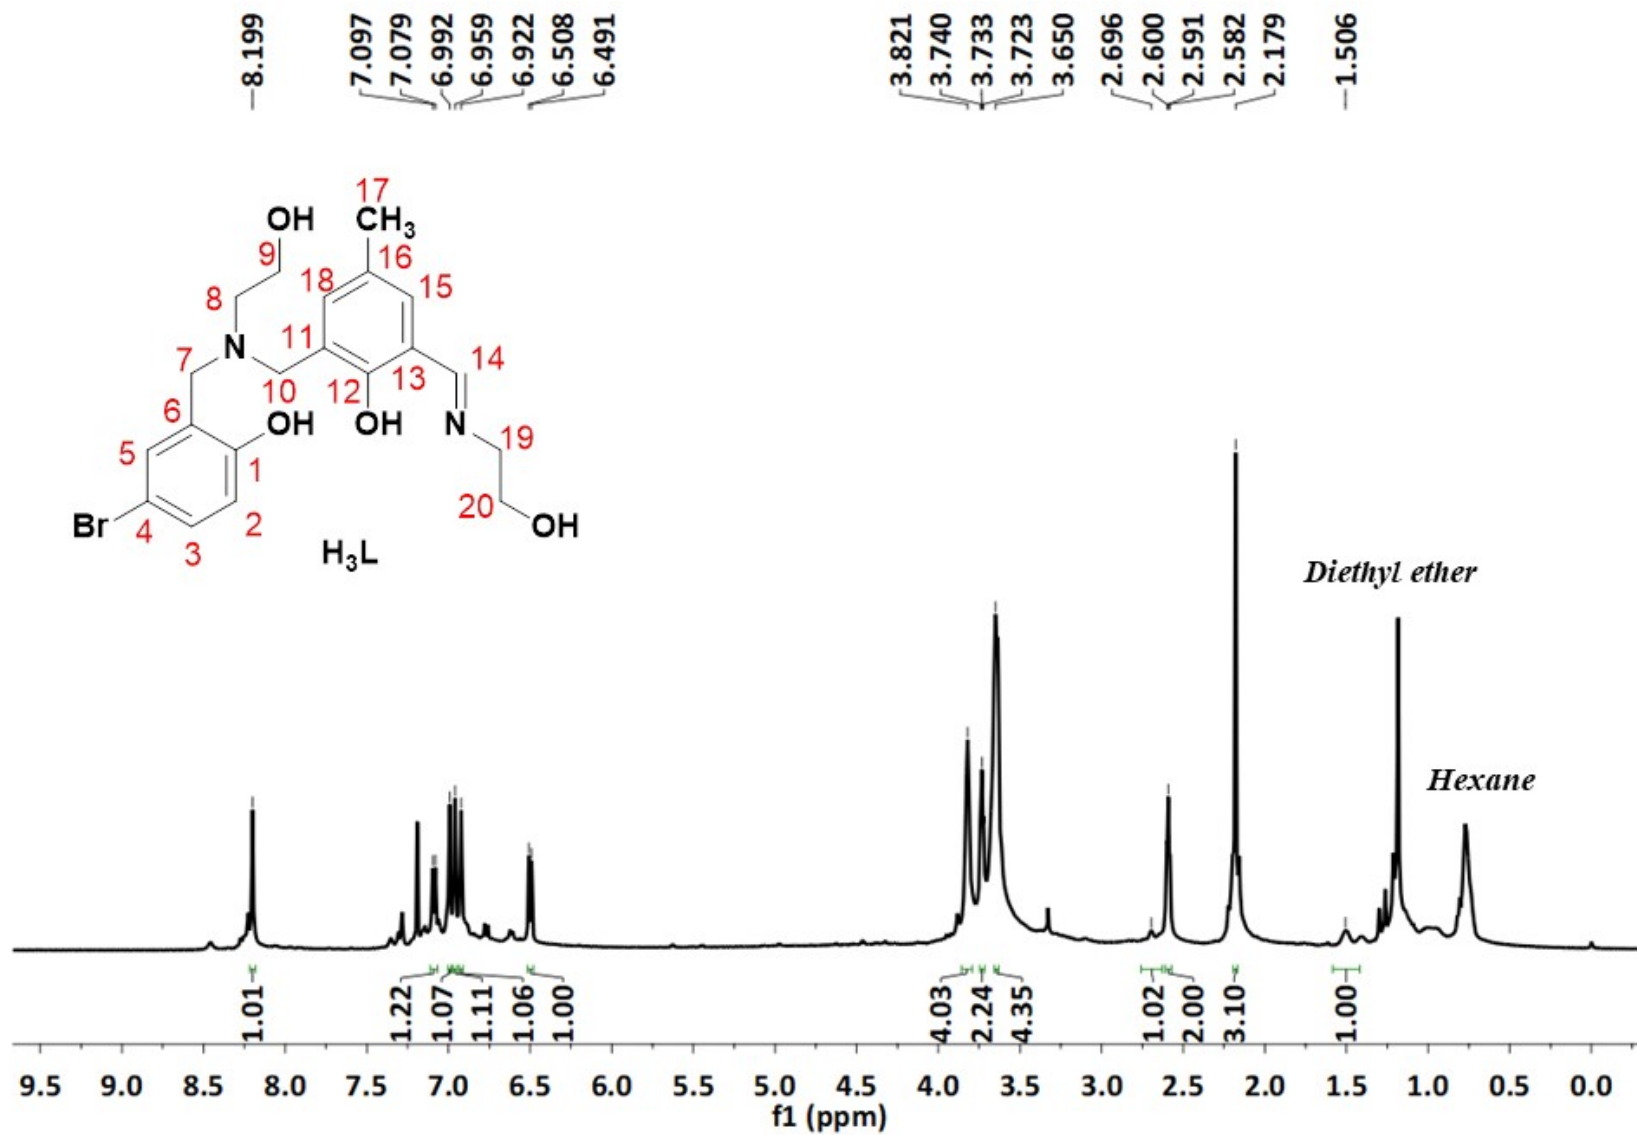

Figure S14  $^1H$ -NMR spectrum (500 MHz,  $CDCl_3$ ) of compartmental ligand  $H_3L$

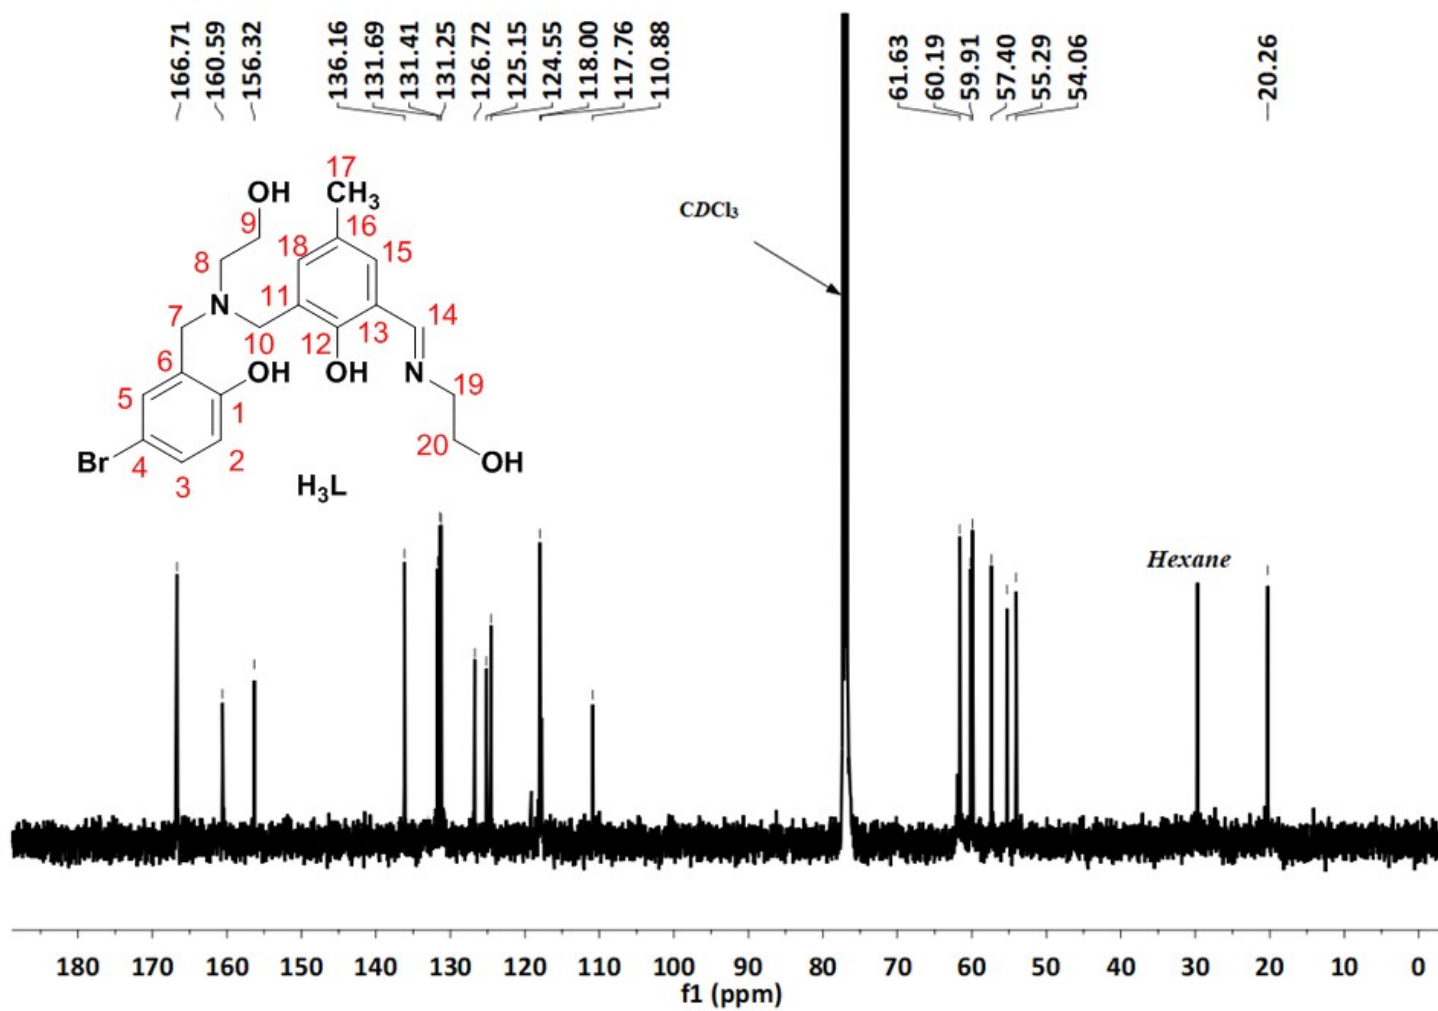

**Figure S15**  $^{13}C$ -NMR spectrum (125 MHz,  $CDCl_3$ ) of compartmental ligand  $H_3L$

30-Apr-2022  
16:41:06  
1: TOF MS ES+  
7.58e6

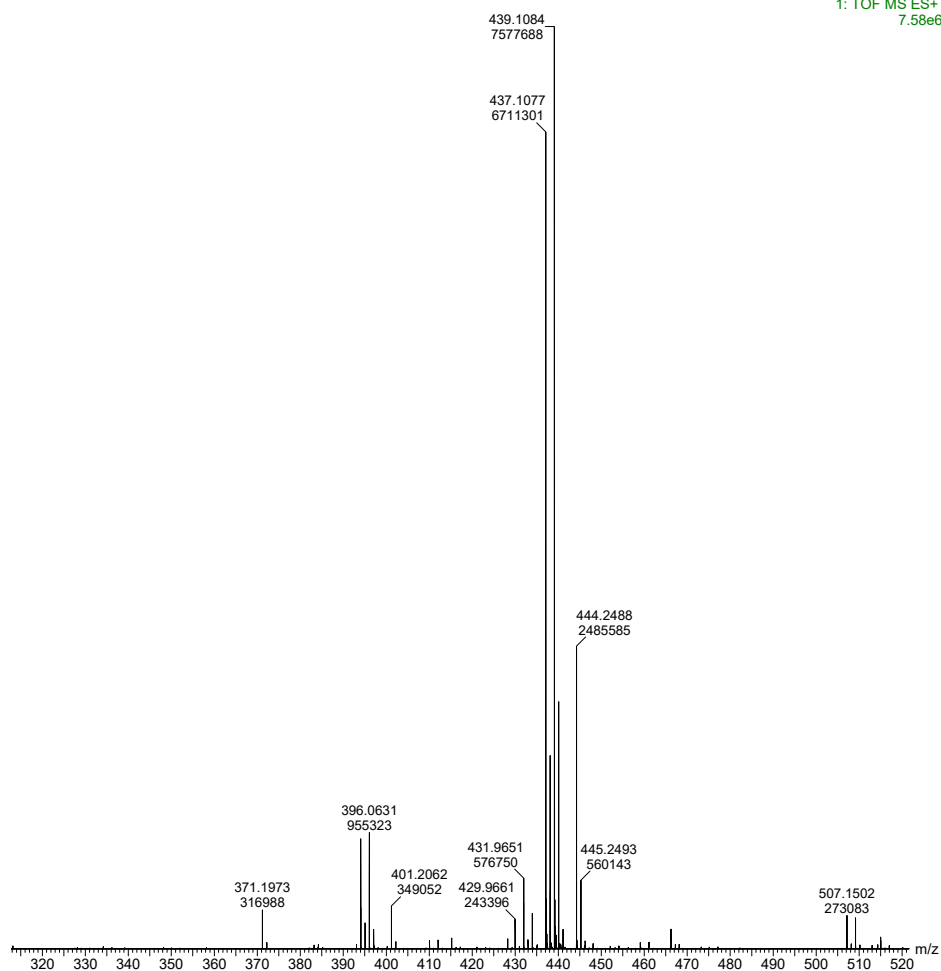

**Figure S16** ESI-MS spectrum of ligand H<sub>3</sub>L

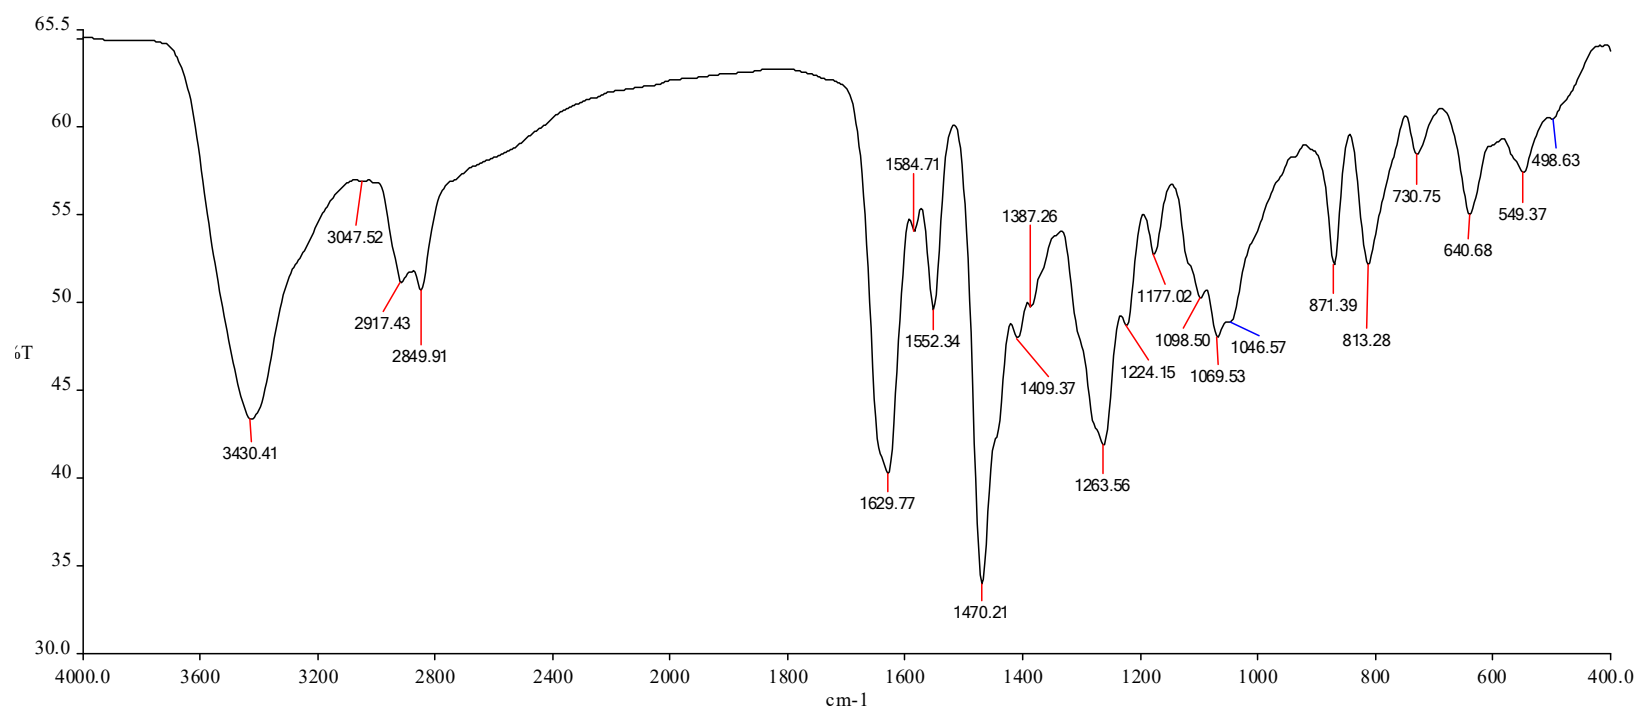

**Figure S17** FT-IR spectrum of trinuclear Zinc(II) cluster

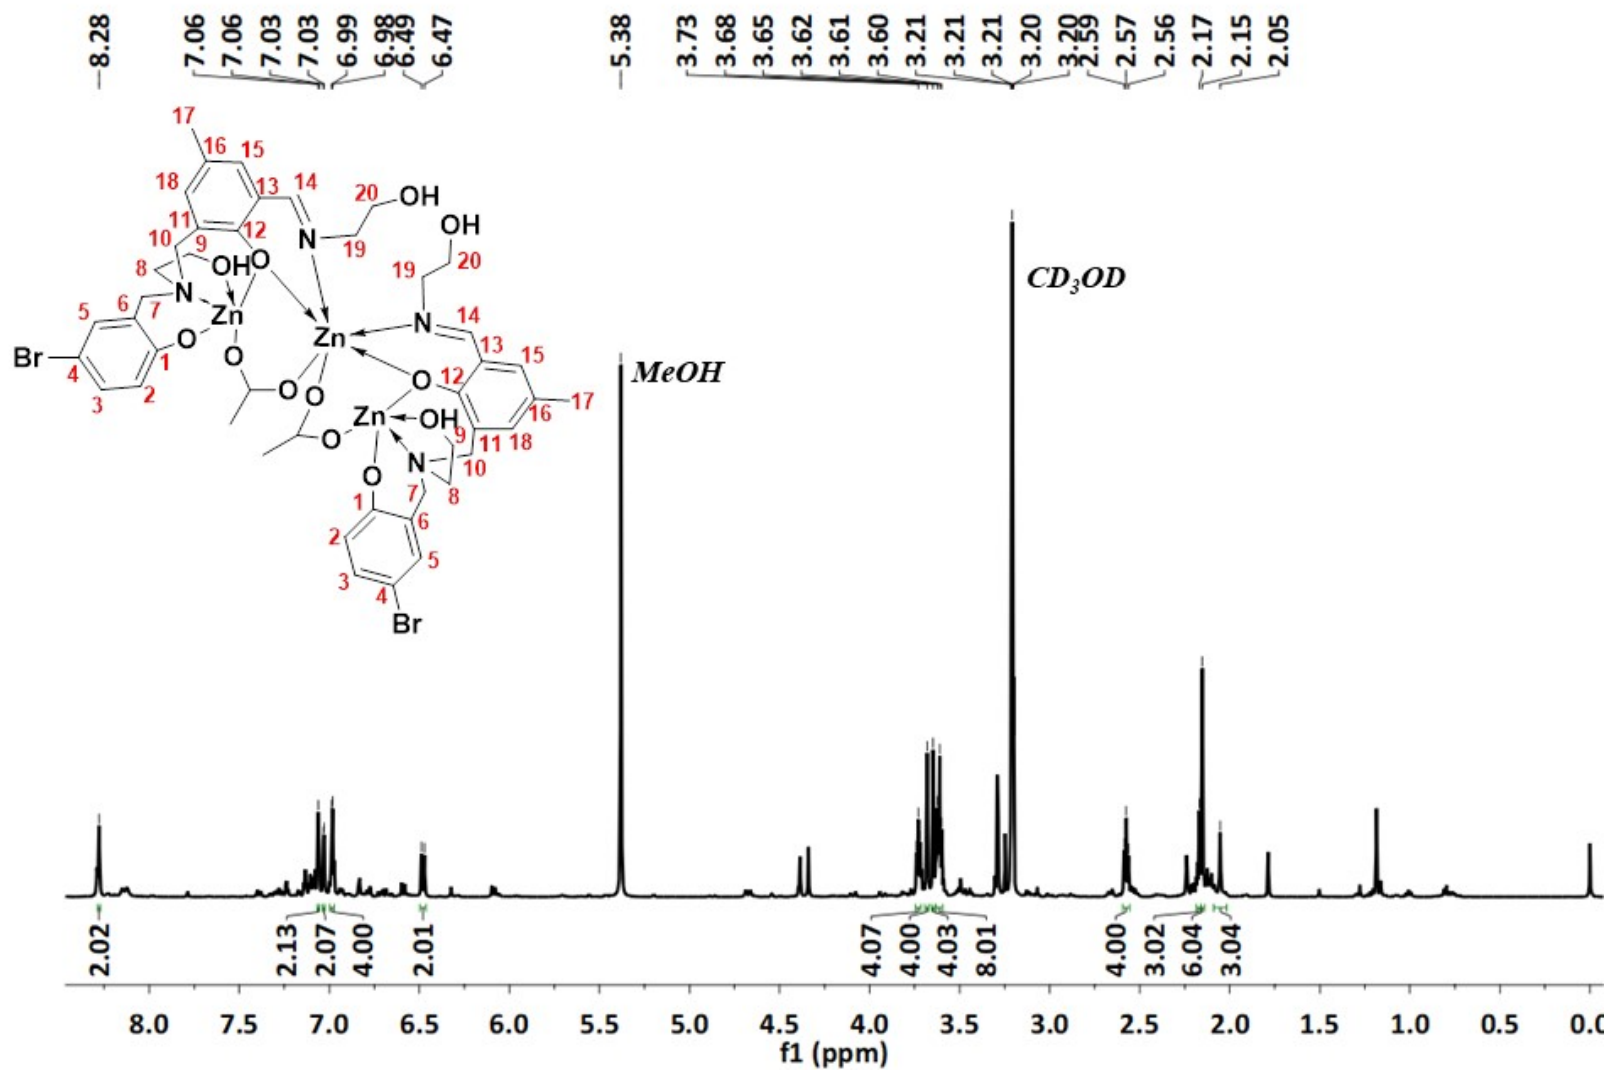

Figure S18  $^1\text{H-NMR}$  spectrum (500 MHz,  $\text{CD}_3\text{OD}$ ) of trinuclear Zinc(II) cluster

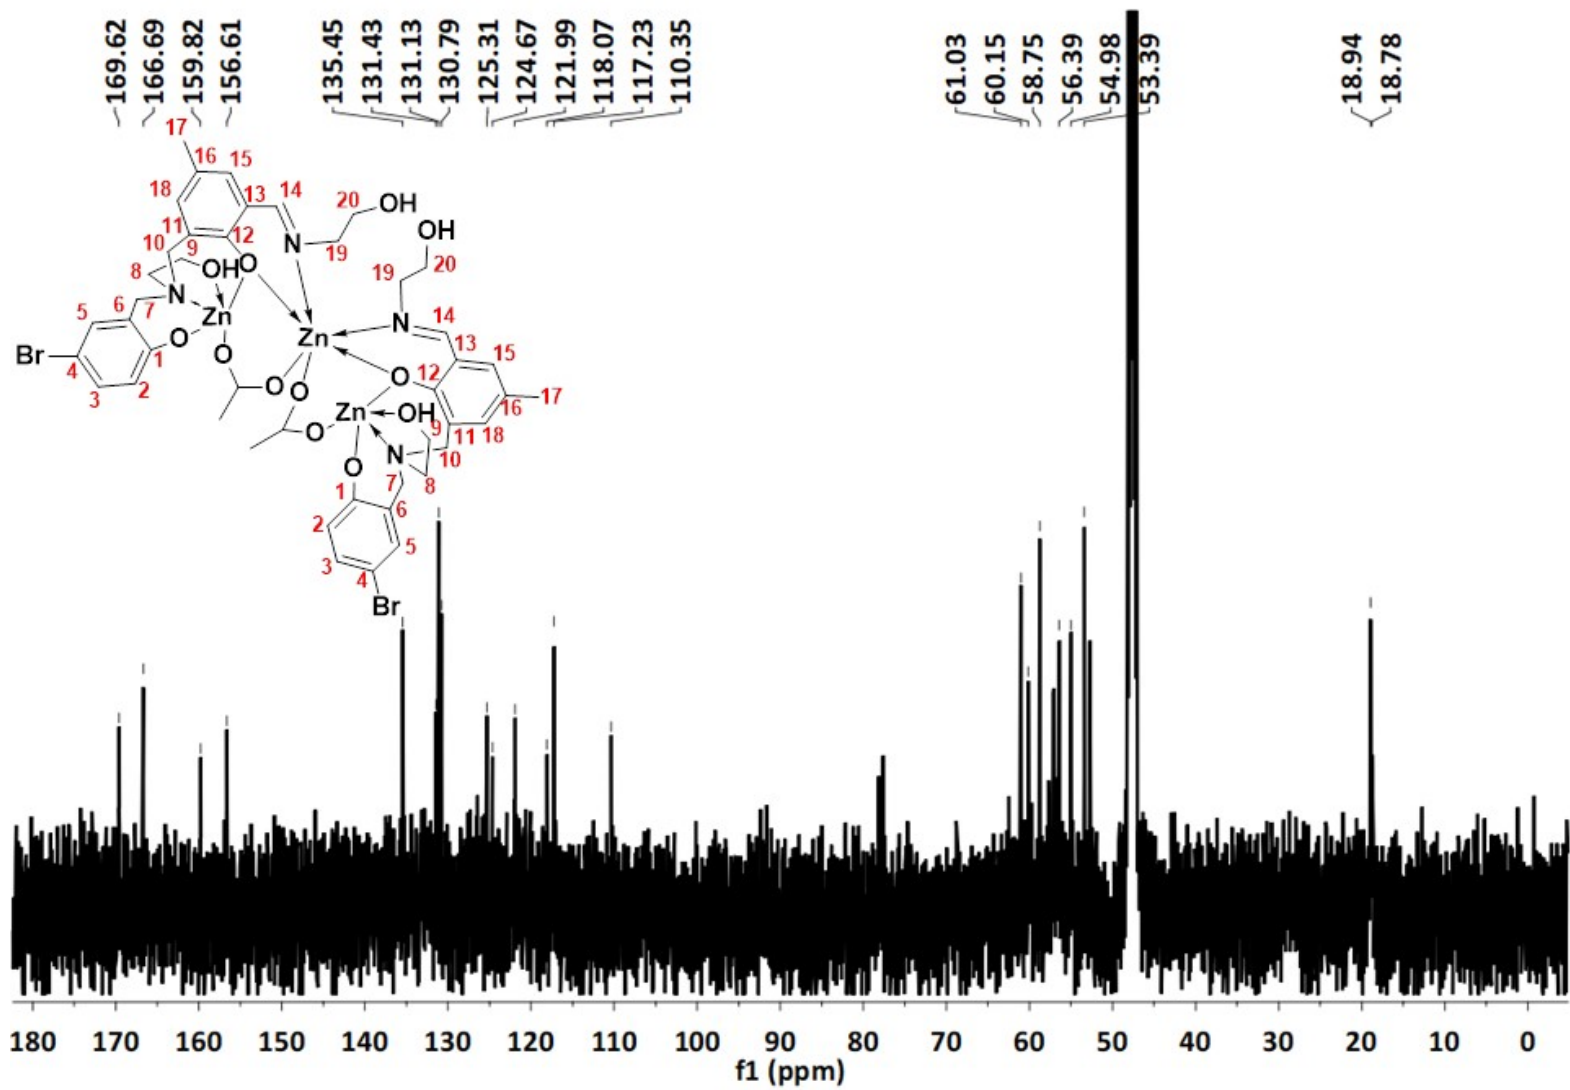

Figure S19 <sup>13</sup>C-NMR spectrum (125 MHz, CD<sub>3</sub>OD) trinuclear Zinc(II) cluster

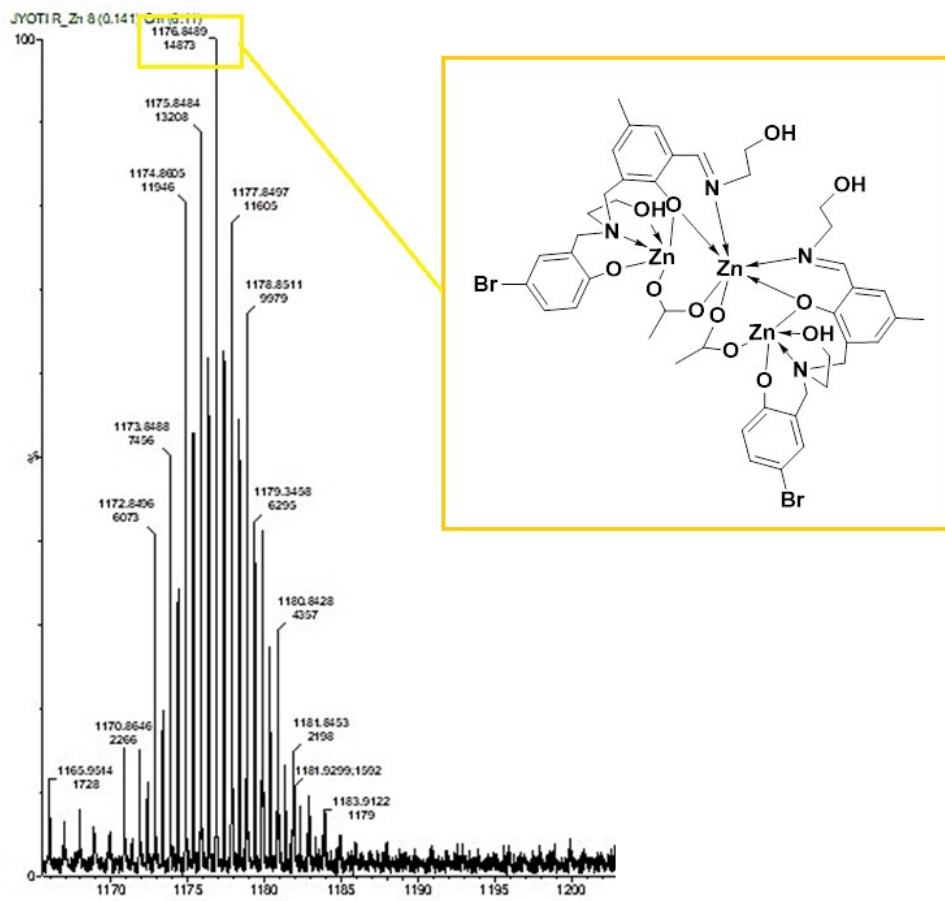

Figure S20 ESI-MS spectrum of trinuclear Zinc(II) cluster



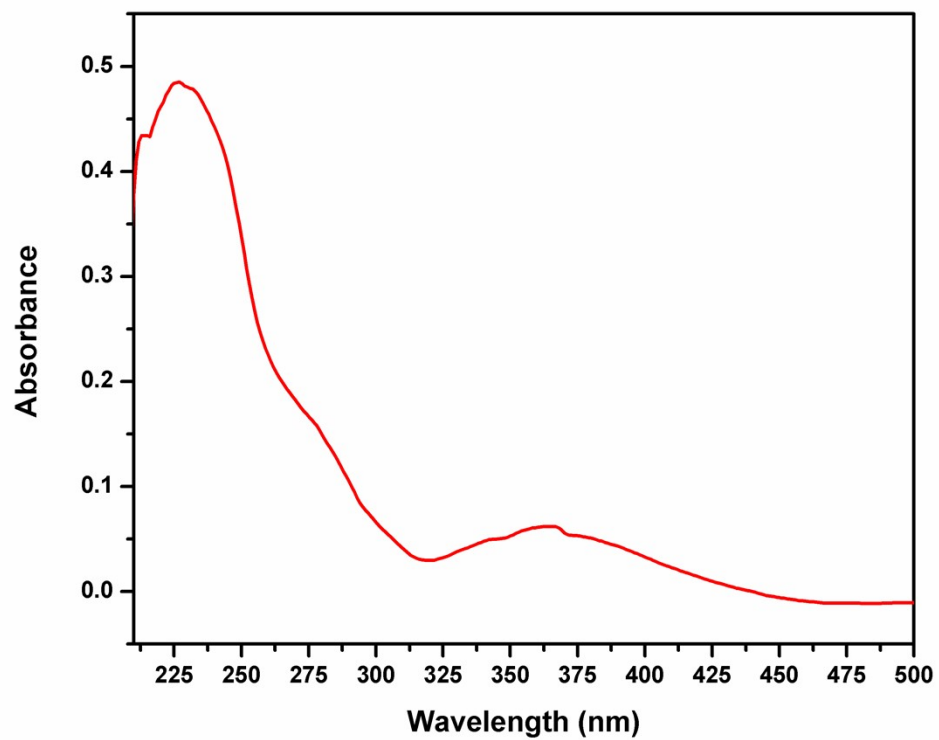

**Figure S21** UV-Visible spectrum of trinuclear Zinc(II) cluster

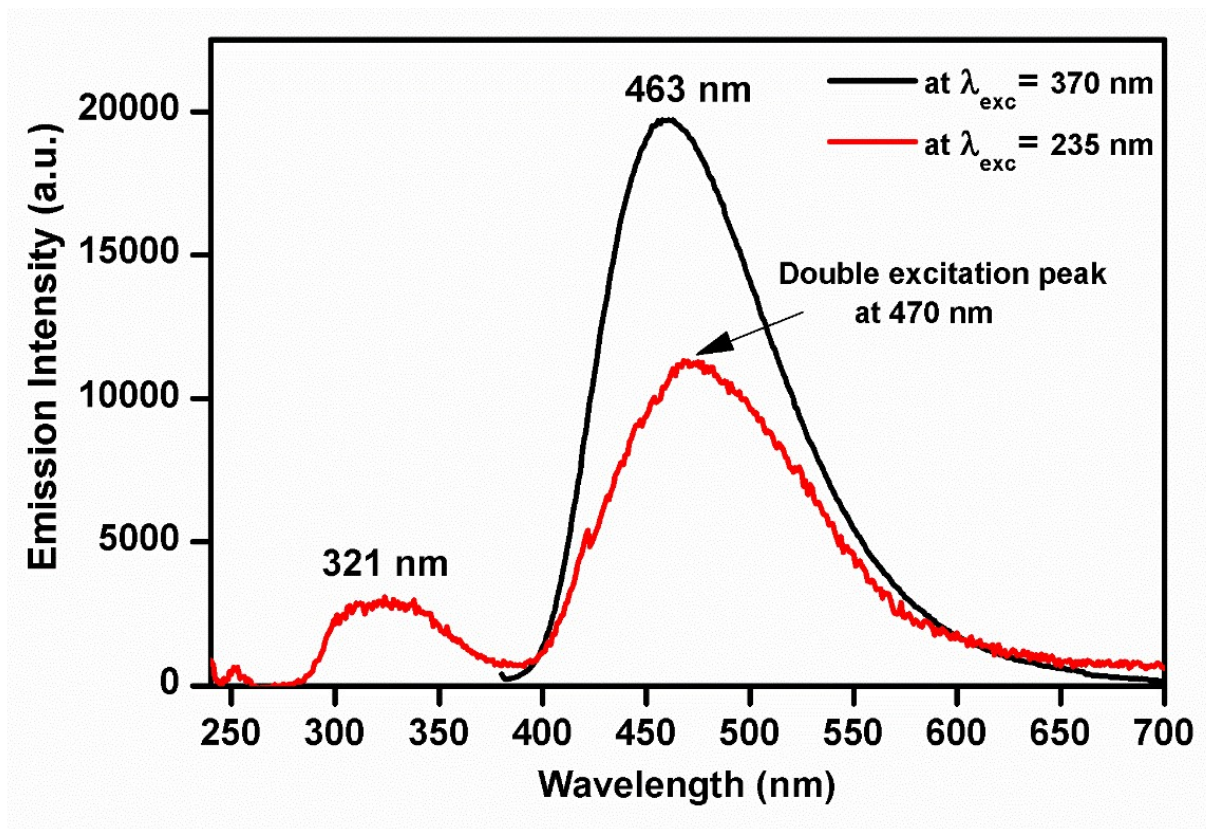

**Figure S22** Fluorescence response of the trinuclear Zinc(II) cluster [At  $\lambda_{exc} = 235$  nm, it gives a weak band at 321 nm and a double excitation band centred at 470 nm while at  $\lambda_{exc} = 370$  nm, it gives a strong intense response at 463 nm in fluorescence emission spectra].

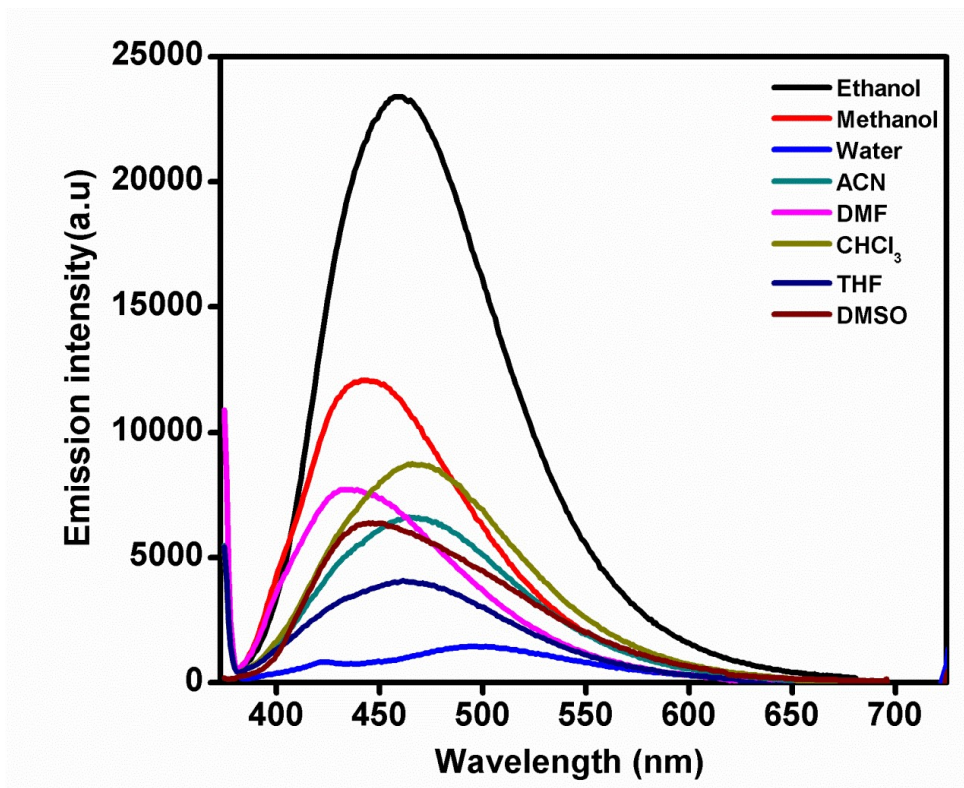

**Figure S23 Solvent system optimization:** Spectrofluorometric response of trinuclear Zinc(II) cluster in pure solvents (i.e. THF, methanol, ethanol, acetonitrile, chloroform, DMSO, DMF) and water. 2 mL of stock solution of trinuclear Zinc(II) cluster (10  $\mu\text{M}$ ) in various solvents mentioned was screened at an excitation wavelength  $\lambda_{\text{exc}} = 370$  nm.

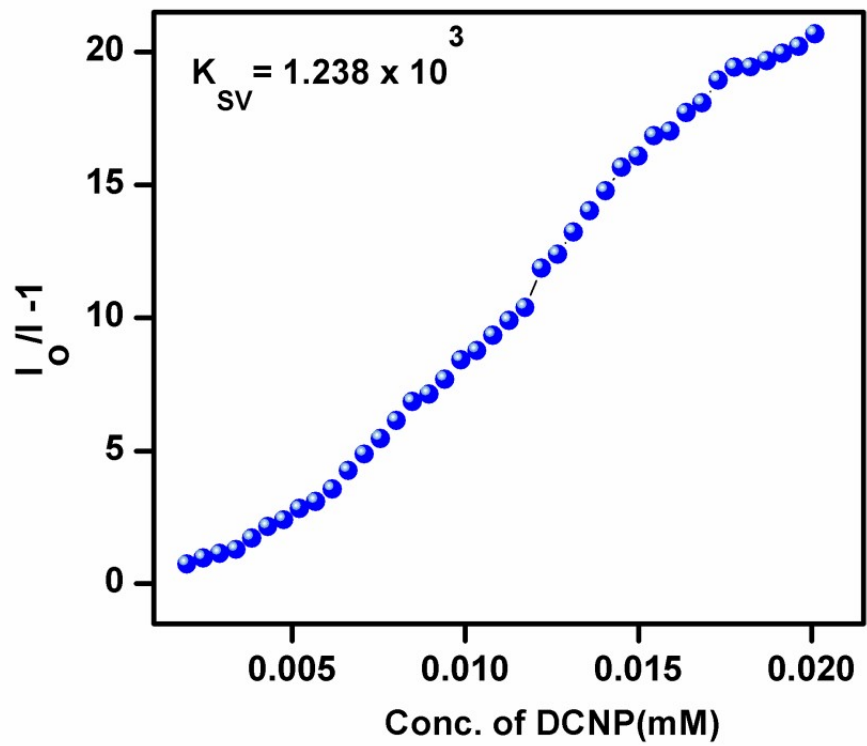

Figure S24 Stern-Volmer plot

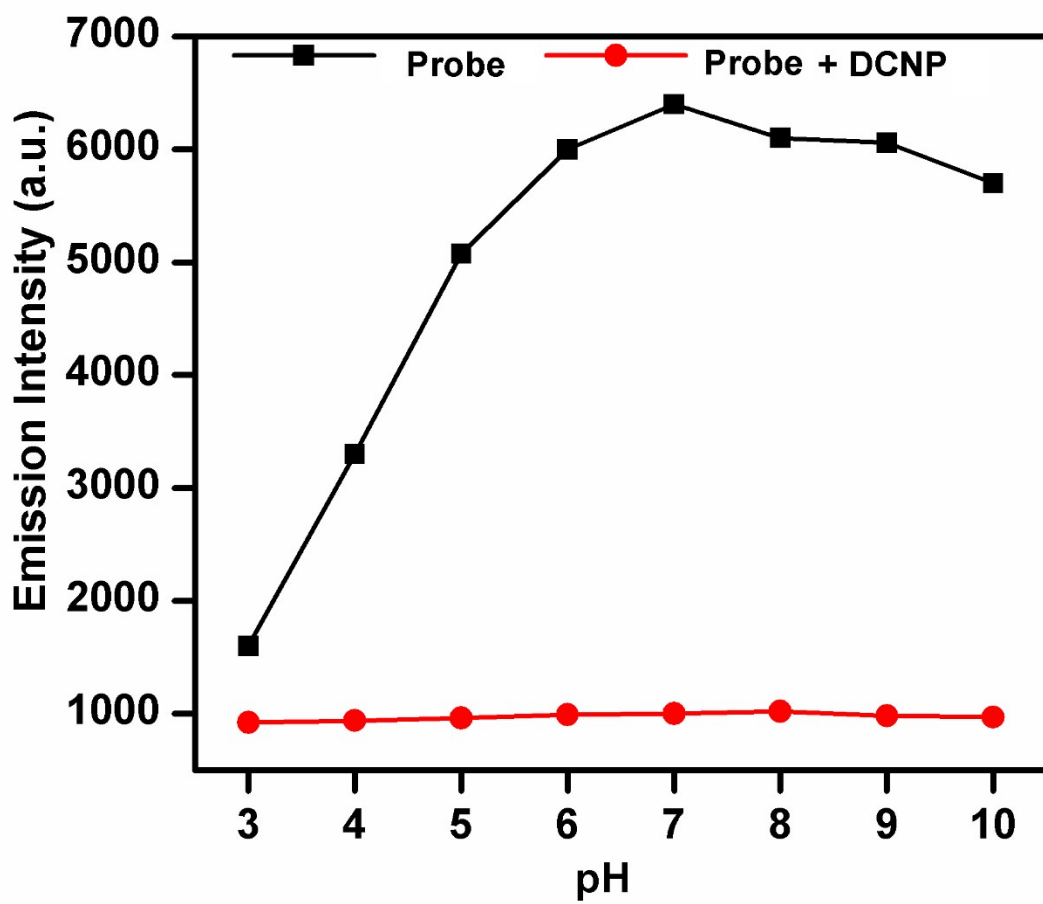

**Figure S25** Effect of pH on the fluorescence intensity of trinuclear Zinc(II) cluster and Zinc(II) cluster -DCNP.

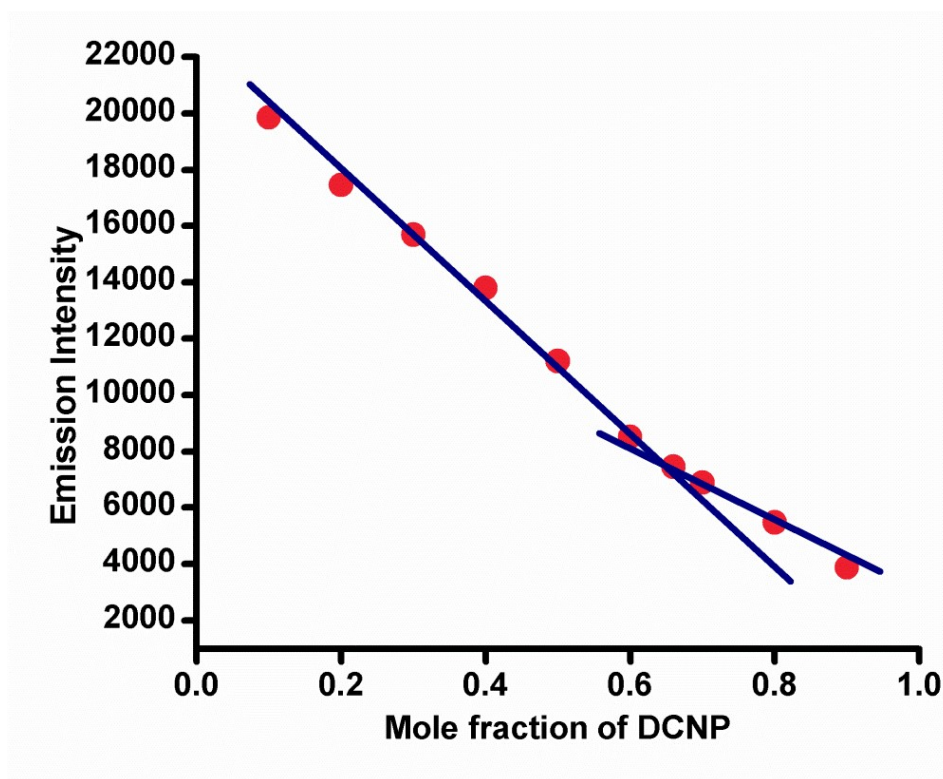

Figure S26 Job plot for the interaction between trinuclear Zinc(II) cluster and DCNP.

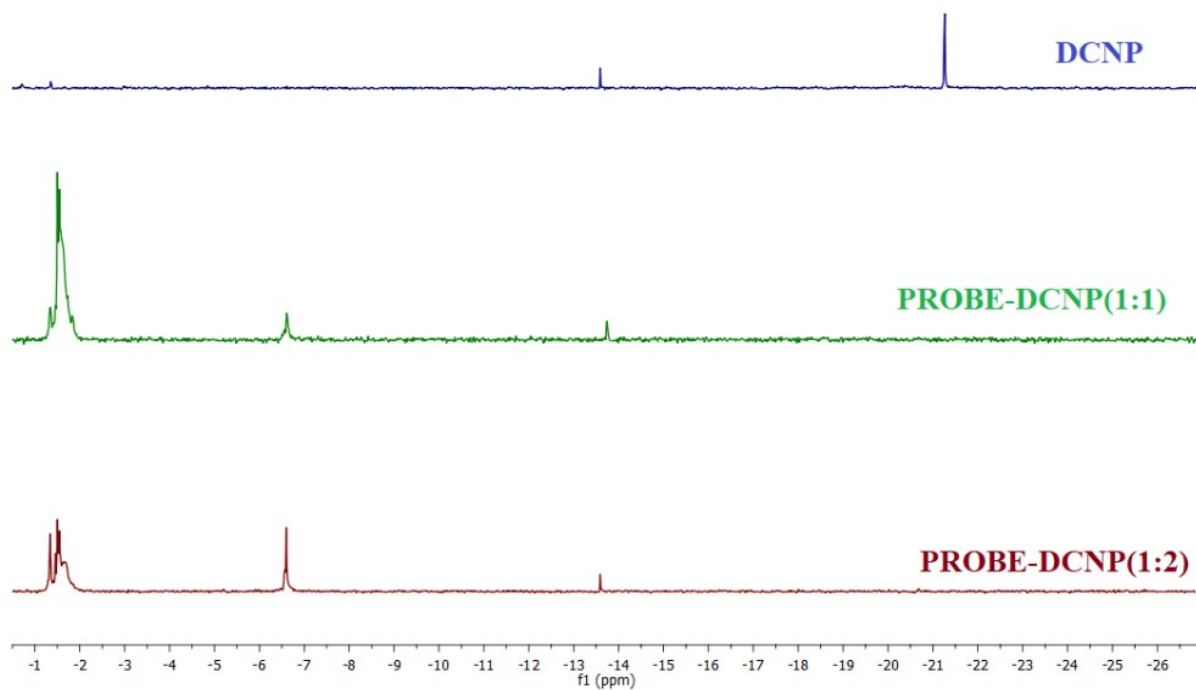

**Figure S27**  $^{31}\text{P}$  NMR titration of DCNP and trinuclear Zinc(II) cluster (PROBE) in 1:1 and 1:2 stoichiometry in  $\text{MeOH-d}^4$ .

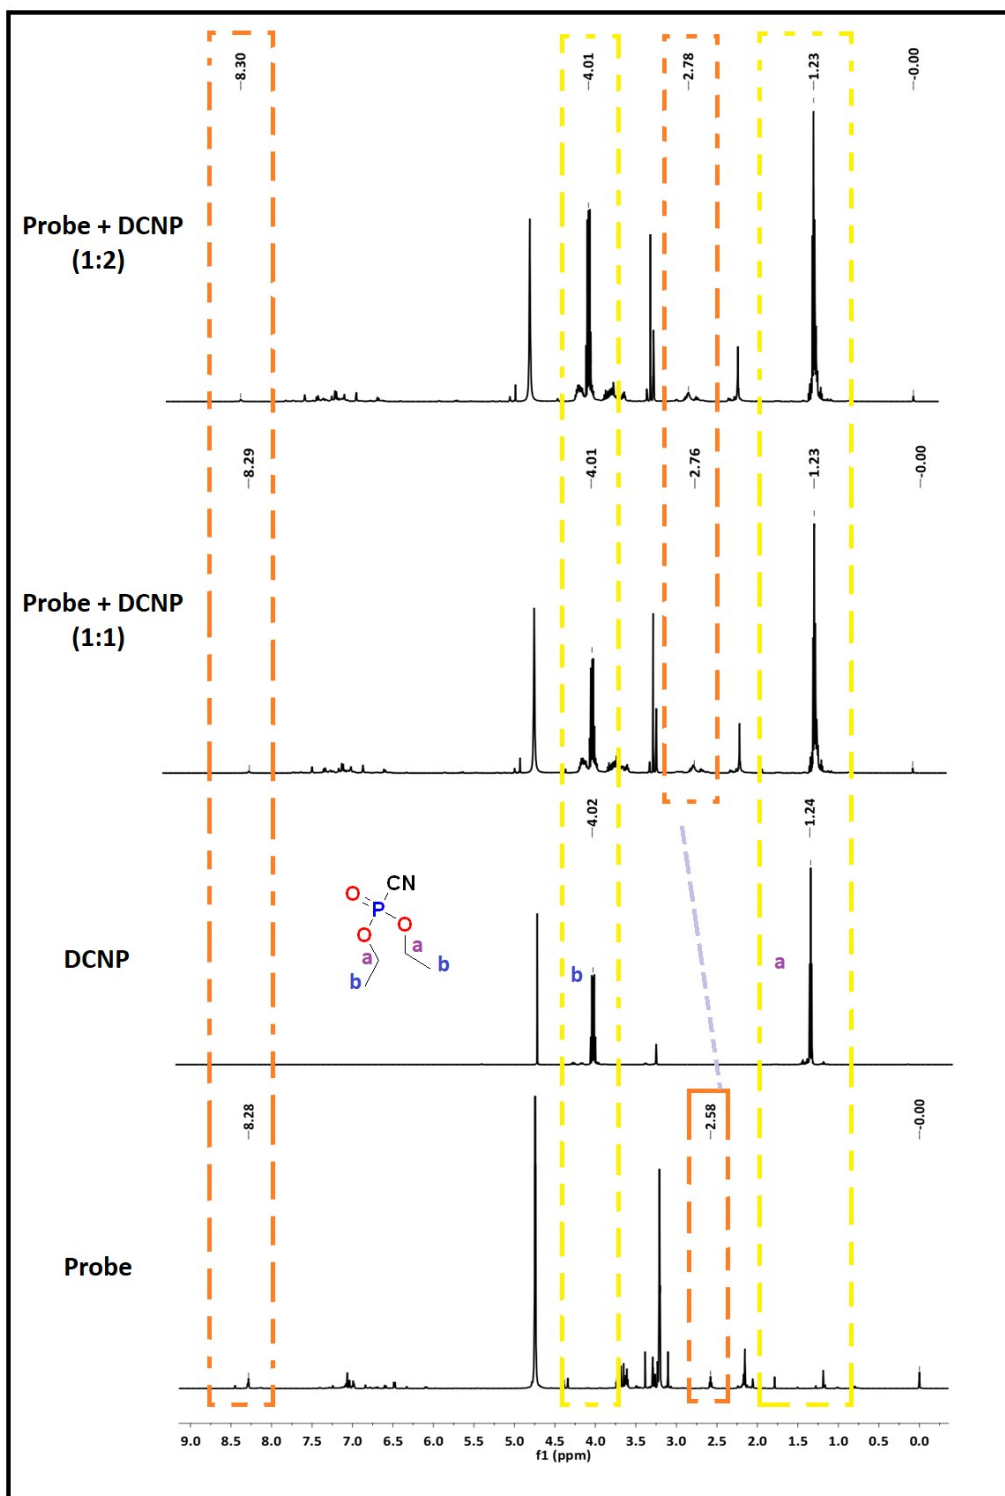

**Figure S28**  $^1\text{H}$  NMR titration of DCNP and trinuclear Zinc(II) cluster (PROBE) in 1:1 and 1:2 stoichiometry at 500 MHz in  $\text{MeOH-d}^4$ .



SAIF, PANJAB UNIVERSITY, CHANDIGARH

SYNAPT-XS#DBA064

JYOTI\_ZN\_CN 4 (0.103) Cm (4:7)

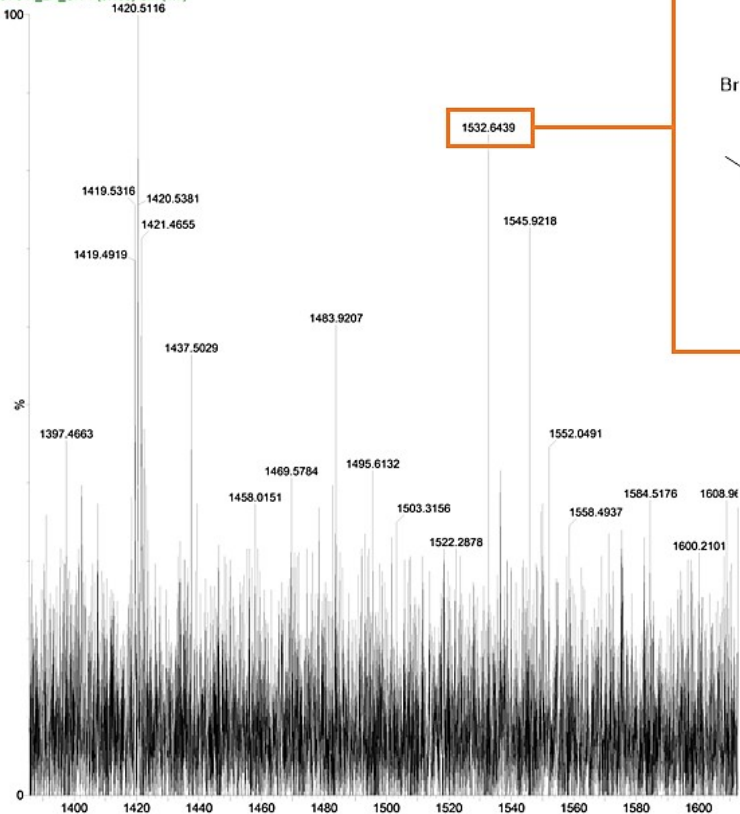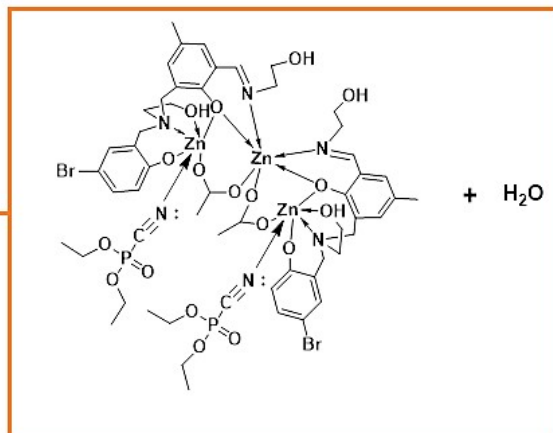

**Figure S29** MS (m/z) showing the formation of product formed after the addition of DCNP to trinuclear Zinc(II) cluster

JYOTI\_ZN\_CN 4 (0.403) Cn (4.7)

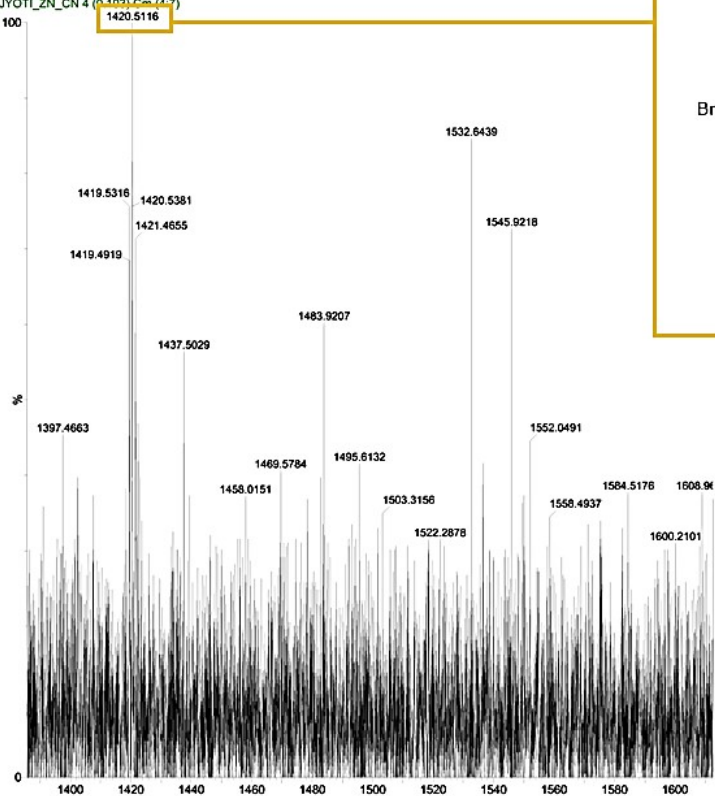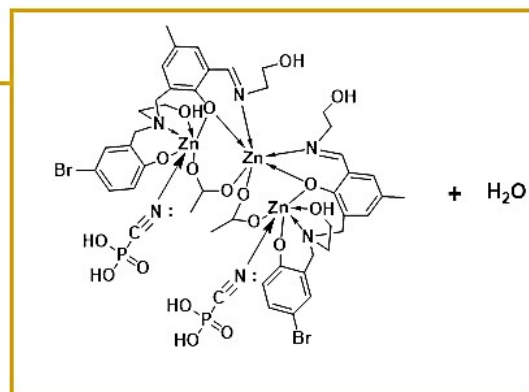

**Figure S30** MS (m/z) showing the presence of hydrolyzed product formed after the addition of DCNP to trinuclear Zinc(II) cluster

SAIF, PANJAB UNIVERSITY CHANDIGARH

SYNAPT-XS#DBA064

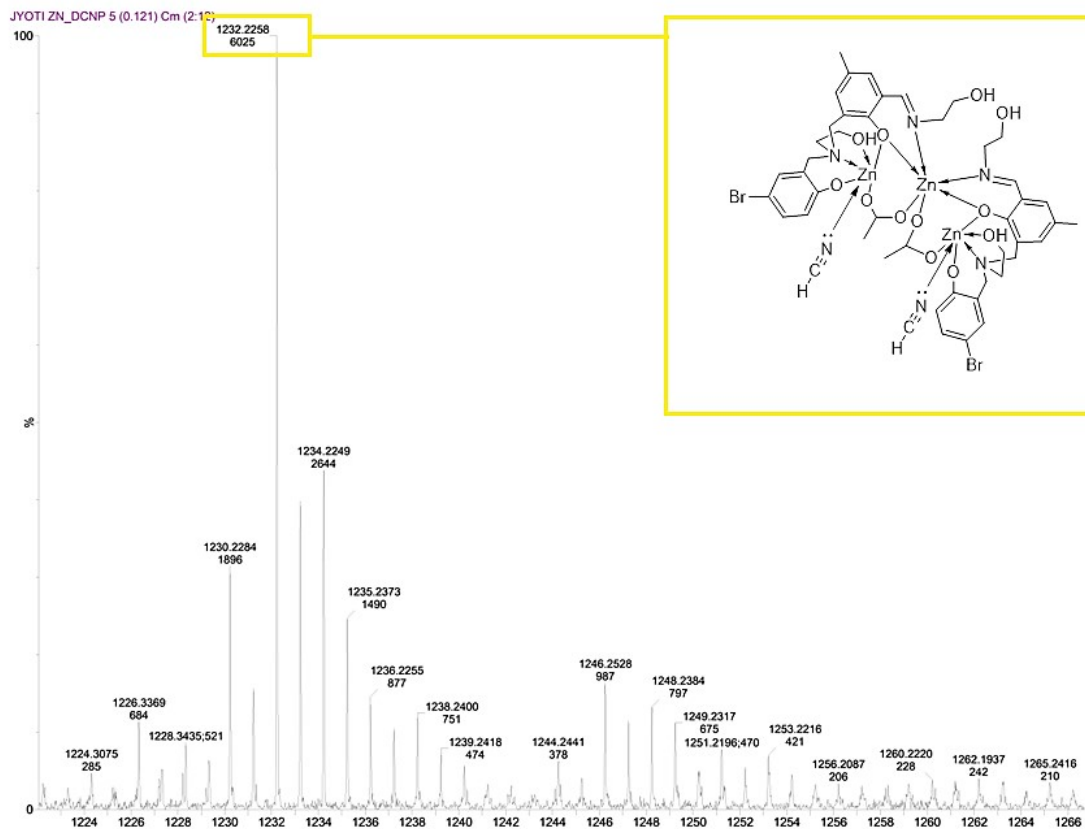

**Figure S31** MS (m/z) of hydrolyzed product with HCN coordinated to trinuclear Zinc(II) cluster

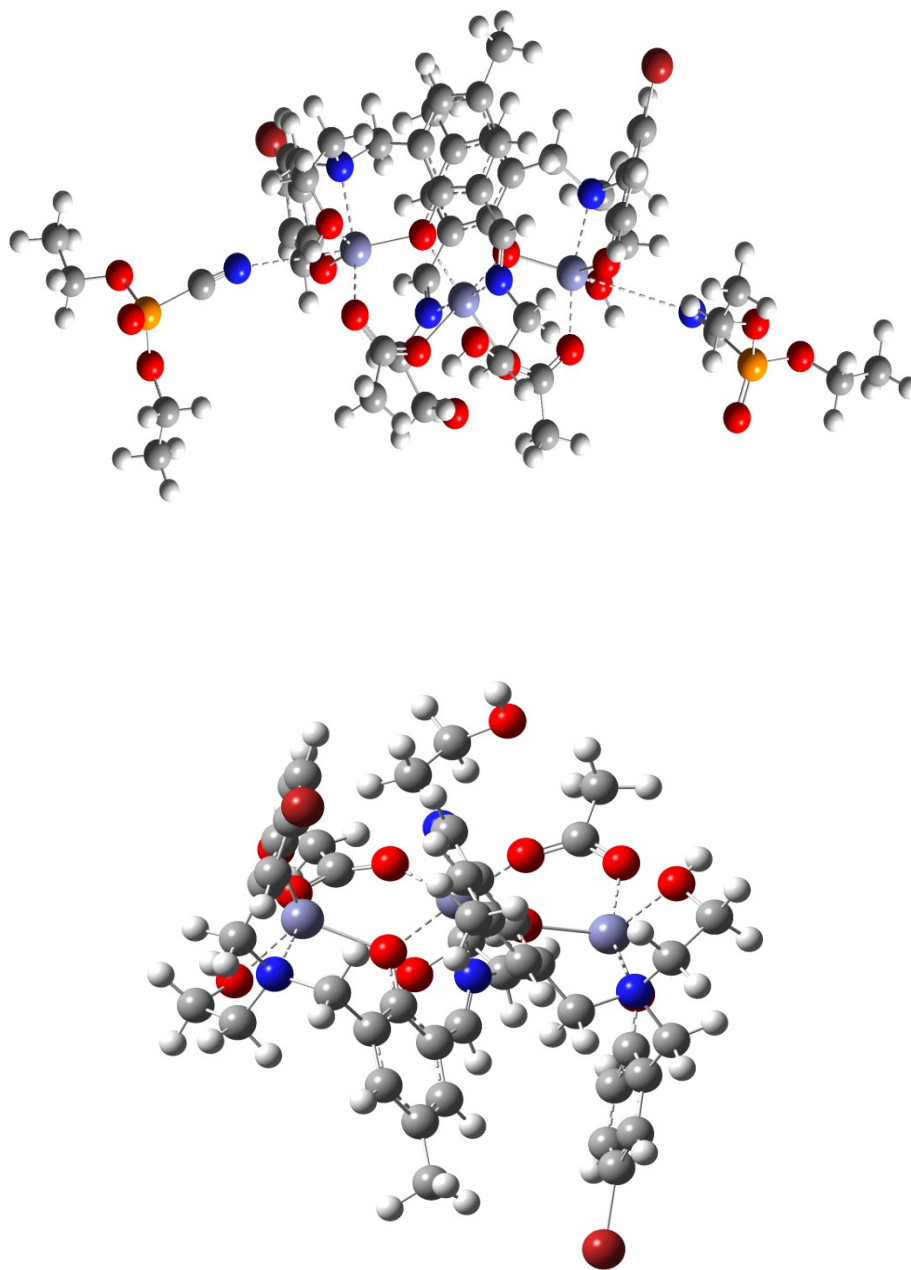

**Figure S32** Optimized structures of trinuclear Zinc(II) cluster and its conjugate with DCNP using B3LYP/ LanL2DZ on Zn, Br, P and 6-31+G (d,p) on C, H, N, O.

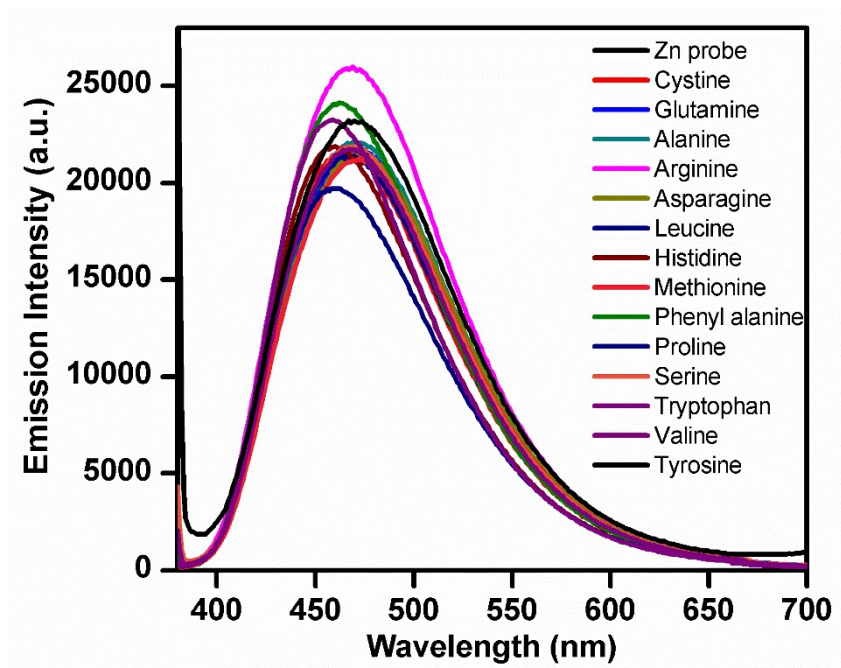

**Figure S33** Comparison of emission intensity of the trinuclear Zinc(II) cluster in the presence of various Bio-relevant amino acids.

**Table S1** Crystallographic data and structural parameters for trinuclear Zinc(II) cluster.

| PARAMETERS            | VALUE                                                                                          | PARAMETERS                                    | VALUE                                                            |
|-----------------------|------------------------------------------------------------------------------------------------|-----------------------------------------------|------------------------------------------------------------------|
| Empirical formula     | C <sub>47</sub> H <sub>60</sub> Br <sub>2</sub> N <sub>5</sub> O <sub>13</sub> Zn <sub>3</sub> | F(000)                                        | 1282.0                                                           |
| Formula weight        | 1257.93                                                                                        | Crystal size/mm <sup>3</sup>                  | 0.24 × 0.11 × 0.08                                               |
| Temperature/K         | 285                                                                                            | Radiation                                     | Mo Kα (λ = 0.71073)                                              |
| Crystal system        | Triclinic                                                                                      | 2θ range for data collection/°                | 6.22 to 50.106                                                   |
| Space group           | P-1                                                                                            | Index ranges                                  | -12 ≤ h ≤ 12,<br>-18 ≤ k ≤ 18,<br>-20 ≤ l ≤ 20                   |
| a/Å                   | 10.8217(6)                                                                                     | Reflections collected                         | 42385                                                            |
| b/Å                   | 15.4938(4)                                                                                     | Independent reflections                       | 9976 [R <sub>int</sub> = 0.0938,<br>R <sub>sigma</sub> = 0.1089] |
| c/Å                   | 17.2737(5)                                                                                     | Data/restraints/parameters                    | 9976/7/646                                                       |
| α/°                   | 84.807(2)                                                                                      | Goodness-of-fit on F <sup>2</sup>             | 0.990                                                            |
| β/°                   | 83.062(4)                                                                                      | Final R indexes [I ≥ 2σ (I)]                  | R <sub>1</sub> = 0.0581,<br>wR <sub>2</sub> = 0.1277             |
| γ/°                   | 80.267(3)                                                                                      | Final R indexes [all data]                    | R <sub>1</sub> = 0.1155,<br>wR <sub>2</sub> = 0.1464             |
| Volume/Å <sup>3</sup> | 2826.40(19)                                                                                    | Largest diff. peak/hole/ e<br>Å <sup>-3</sup> | 0.67/-0.57                                                       |
| Z                     | 2                                                                                              | ρ <sub>calc</sub> g/cm <sup>3</sup>           | 1.478                                                            |
| μ/mm <sup>-1</sup>    | 2.736                                                                                          |                                               |                                                                  |

**Table S2** Bonding parameters for trinuclear Zinc(II) cluster.

| Bond angles (°) |            |           |            |            |            |
|-----------------|------------|-----------|------------|------------|------------|
| O8 Zn3 O10      | 121.13(15) | O2 Zn1 O3 | 123.99(15) | O3 Zn2 O8  | 90.21(13)  |
| O8 Zn3 N3       | 90.41(16)  | O2 Zn1 O1 | 110.79(15) | O12 Zn2 O8 | 177.49(14) |
| O10 Zn3 N3      | 78.90(15)  | O2 Zn1 O4 | 95.34(16)  | O12 Zn2 O3 | 92.29(14)  |
| O9 Zn3 O8       | 129.71(14) | O2 Zn1 N1 | 92.90(17)  | O12 Zn2 O6 | 90.60(15)  |
| O9 Zn3 O10      | 108.70(14) | O3 Zn1 O1 | 124.55(15) | O6 Zn2 O8  | 86.90(15)  |
| O9 Zn3 O11      | 92.37(16)  | O3 Zn1 O4 | 97.56(16)  | O6 Zn2 O3  | 176.71(16) |
| O9 Zn3 N3       | 92.86(16)  | O3 Zn1 N1 | 90.29(15)  | N4 Zn2 O8  | 87.44(18)  |
| O11 Zn3 O8      | 98.55(15)  | O1 Zn1 N1 | 78.36(15)  | N4 Zn2 O3  | 92.19(17)  |
| O11 Zn3 O10     | 84.20(15)  | O4 Zn1 O1 | 84.56(15)  | N4 Zn2 O12 | 92.35(19)  |
| O11 Zn3 N3      | 163.10(15) | O4 Zn1 N1 | 162.77(16) | N4 Zn2 O6  | 86.12(18)  |
| Bond length (Å) |            |           |            |            |            |
| Zn3-O8          | 2.025(4)   | Zn1-O4    | 2.010(4)   | Zn3-O10    | 2.111(3)   |
| Zn1-N1          | 2.169(4)   | Zn3-O9    | 1.973(4)   | Zn2-O8     | 2.154(3)   |
| Zn3-O11         | 2.005(4)   | Zn2-O3    | 2.132(4)   | Zn3-N3     | 2.163(4)   |
| Zn2-O12         | 2.101(4)   | Zn3-O2    | 1.968(4)   | Zn2-O6     | 2.125(4)   |
| Zn1-O3          | 2.008(4)   | Zn2-N4    | 2.098(5)   | Zn1-O1     | 2.126(3)   |
| Zn2-N2          | 2.072(5)   | Zn1-O8    | 2.025(4)   | Zn2-O4     | 2.010(4)   |

**Table S3.** Readings of the emission measurements of trinuclear Zinc(II) cluster in the absence of analyte.

| Blank Readings                  | Fluorescence Intensity |
|---------------------------------|------------------------|
| 1                               | 19689                  |
| 2                               | 19610                  |
| 3                               | 19440                  |
| 4                               | 19505                  |
| 5                               | 19660                  |
| 6                               | 19490                  |
| 7                               | 19505                  |
| 8                               | 19450                  |
| 9                               | 19550                  |
| 10                              | 19639                  |
| Standard Deviation ( $\sigma$ ) | 89.78                  |

**Table S4.** Different compounds and corresponding methods for DCNP detection

| S. No | Compound                    | Technique              | Selectivity | Degradation | LOD                           | Reference |
|-------|-----------------------------|------------------------|-------------|-------------|-------------------------------|-----------|
| 1     | Hemicyanine-based           | Fluorescence, Turn on  | Yes         | No          | 4.5 nM                        | [18]      |
| 2     | Hydrazone-based Schiff base | Fluorescence, Turn off | No          | Yes         | 158.2 nM                      | [23]      |
| 3     | Imidazopyridine-based probe | Fluorescence, Turn off | No          | No          | 3.6 $\mu$ M                   | [46]      |
| 4     | Imidazo[1,2-a]pyridine      | Fluorescence, Turn off | Yes         | No          | 0.66 $\mu$ M and 0.54 $\mu$ M | [47]      |
| 5     | Trinuclear Zinc cluster     | Fluorescence, Turn off | Yes         | Yes         | 186 nM                        | This work |

**Table S5** Calculated coordinates of trinuclear Zinc(II) cluster using B3LYP/ LanL2DZ on Zn, Br and 6-31+G (d,p) on C, H, N, O.

0,1

|    | X             | Y             | Z             |
|----|---------------|---------------|---------------|
| Zn | -2.439830511  | 0.8973178653  | -2.3400920514 |
| Zn | 2.435726774 4 | 0.874148798   | 2.3596215796  |
| Zn | 0.0003497551  | 1.9618300153  | -0.0008607522 |
| Br | -6.9546803136 | -3.1638277802 | 1.9478923043  |
| Br | 6.9270240879  | -3.1800932451 | -1.9568076796 |
| O  | -0.7116574219 | 0.3947834874  | -1.3660180058 |

|   |                |                |               |
|---|----------------|----------------|---------------|
| O | 4.21054 58746  | 1.061041849    | 1.4978994194  |
| O | 0.7102481943   | 0.4034260708   | 1.3746462768  |
| O | -2.2251591076  | 0.6600098564   | -4.5519133806 |
| H | -2.4670064311  | 1.4969820 163  | -4.9731594651 |
| O | -4.2092207911  | 1.0849959861   | -1.4743470679 |
| O | -2.0881346566  | 2.810512339    | -2.9553896396 |
| O | 2.2489086772   | 0.6336968143   | 4.5705125678  |
| H | 2.507166413    | 1.4577185705   | 5.0063856337  |
| O | 2.1165298063   | 2.799062848 2  | 2.9738515193  |
| O | 0.9461600767   | 3.5136479632   | 1.1864831754  |
| N | -2.860873207 9 | -1.3416032184  | -2.7583121058 |
| N | 2.835457219    | -1.3658409632  | 2.7587213742  |
| O | -0.8801370155  | 3.512448183    | -1.1910916386 |
| N | 1.8288266112   | 1.8396783493   | -1.2290203149 |
| N | -1.8164370766  | 1.8727213877   | 1.2269035666  |
| O | 1.950186635 8  | 4.0932992931   | -3.2666140451 |
| H | 2.7682922931   | 3.9067013811   | -3.7451577003 |
| C | 0.0431475205   | -0.6312623032  | -1.7497900903 |
| C | 2.5097852312   | -1.67364809 5  | 4.169252688   |
| H | 2.9981863934   | -2.6048809986  | 4.500091241   |
| H | 1.4298715993   | -1.8163074848  | 4.246654063   |
| C | -2.5381172241  | -1.6425093811  | -4.170856182  |
| H | -3.0432977211  | -2.5612860969  | -4.5111931041 |
| H | -1.4608831447  | -1.80442686 83 | -4.2483657134 |
| C | -4.8297753599  | 0.1600561889   | -0.7700914009 |
| C | -0.53666 63745 | -1.9108749118  | -1.9871440022 |
| C | -0.0593365678  | -0.6149168783  | 1.7579 846405 |
| C | -4.3097981711  | -1.6068314771  | -2.5144373779 |
| H | -4.5063835934  | -2. 6780730587 | -2.6875051243 |
| H | -4.8623565627  | -1.0482963313  | -3.2786442027 |
| C | -1.6972949371  | -2.8314707472  | 2.5718856665  |
| C | -2.2353329476  | -1.563576792 6 | 2.3798519701  |
| H | -3.3011123572  | -1.4102003752  | 2.534791453   |
| C | 1.9834489077   | -2.1315885587  | 1.7992286181  |
| H | 2.2938500889   | -1.8237227444  | 0.7967334473  |
| H | 2.2005902141   | -3.2078819291  | 1.893000179   |
| C | 0.503967077    | -1.9020365131  | 1.9883789858  |
| C | 4.8229174278   | -1.2395192999  | 1.1649480858  |
| C | -1.4582983017  | -0.457489318   | 1.9723268735  |
| C | 4.8257494761   | 0.1366944044   | 0.7885439291  |
| C | 1.4455674185   | -0.493004635   | -1.9596539596 |
| C | -2.0196037141  | -2.1228510972  | -1.802968589  |
| H | -2.2489413962  | -3.1961490803  | -1.90286004   |
| H | -2.327663592   | -1.8176813769  | -0.7989003889 |
| C | 4.2807282691   | -1.6453323743  | 2.5116789537  |
| H | 4.4646905567   | -2.720776735   | 2.6716677769  |
| H | 4.8402685233   | -1.1030942143  | 3.2824987786  |
| C | -6.113946289   | -1.7909164295  | 0.8168346999  |
| C | -0.3135950114  | -2.9656357814  | 2.3739532534  |
| H | 0.147461433    | -3.9412486499  | 2.5253465711  |
| C | -5.4723342721  | -2.1704028455  | -0.357154645  |
| H | -5.4698844624  | -3.213086502 9 | -0.6622627687 |
| C | 2.2097114057   | -1.6092293075  | -2.3667770572 |



|   |                |                |                |
|---|----------------|----------------|----------------|
| H | 3.2782785732   | -1.4704735047  | -2.5171531636  |
| C | -4.8448309353  | -1.2113507712  | -1.16223 2852  |
| C | 0.2681819172   | -2.9833429621  | -2.372468982   |
| H | -0.2055204778  | -3.9519 633852 | -2.5294575471  |
| C | -5.5402054043  | 0.5073846552   | 0.4067571238   |
| H | -5.58 47281912 | 1.5568678828   | 0.6803008555   |
| C | 6.1752455778   | -0.4674049626  | -1.176 2871693 |
| H | 6.7171955729   | -0.167999177   | -2.0678483136  |
| C | -2.9042572774  | -0.4810793266  | -5.0911461876  |
| H | -2.5514835073  | -0.6919975966  | -6.1078202853  |
| H | -3.9853319581  | -0.2998452374  | -5.1247039122  |
| C | 1.6552585885   | -2.8683538991  | -2.5640708952  |
| C | 1.5212415176   | 3.696509702    | 2.2911043753   |
| C | 2.8998628904   | -0.5288658839  | 5.100191349    |
| H | 2.5392668144   | -0.7404890161  | 6.113845236    |
| H | 3.984574214    | -0.3721844871  | 5.1381723459   |
| C | -6.1722374313  | -0.4509881674  | 1.1966312426   |
| H | -6.7023848803  | -0.1554994215  | 2.0964787933   |
| C | 5.4433689593   | - 2.1960968344 | 0.3516988236   |
| H | 5.4264372492   | -3.2421952073  | 0.6442966002   |
| C | 5.5495988542   | 0.4889647724   | -0.3787837868  |
| H | 5.6109883593   | 1.5415859536   | -0 .6370724539 |
| C | -1.4391334072  | 3.6970796395   | -2.3074099642  |
| C | 6.0968047949   | -1.8110391827  | -0.814114409   |
| C | -2.1838481642  | 0.8019007545   | 1.837998189    |
| H | -3.1741868951  | 0.7884808328   | 2.3071387742   |
| C | 2.1853749923   | 0.7563149084   | -1 .8257985099 |
| H | 3.1820205573   | 0.7227644204   | -2.282883552   |
| C | -2.7717754602  | 2.9872396243   | 1.2312622446   |
| H | -3.6855270097  | 2.7032994762   | 1.770038172    |
| H | - 3.0423671056 | 3.2048189045   | 0.1942113435   |
| C | 2.240761664    | 4.2219353277   | -1.8719412445  |
| H | 1.3000270876   | 4.4968549401   | -1.3945050137  |
| H | 2.9694518957   | 5.0288527287   | -1.7018226239  |
| C | 2.7919893186   | 2.9431007786   | -1.242710971   |
| H | 3.7093580891   | 2.6390822871   | -1.7712222062  |
| H | 3.0703447862   | 3.1646192101   | -0.20 75223228 |
| C | -2.54862987    | -4.0056516543  | 2.9997689324   |
| H | -2.3344367574  | -4.3 022960058 | 4.0345668592   |
| H | -2.3664391255  | -4.8834837242  | 2.3687782434   |
| H | -3 .6140115317 | -3.7672533396  | 2.9377781974   |
| C | 2.4912771465   | -4.0547457126  | -2.9882232701  |
| H | 3.5585464404   | -3.8180934294  | -2.9610739618  |
| H | 2.2472324164   | -4.3751930768  | -4.009091212   |
| H | 2.3251903181   | -4.9172495275  | -2.3319172613  |
| O | -2.0463234488  | 4.0270514659   | 3.263913545    |
| H | -1.51667686    | 4.7418092918   | 3. 6363598284  |
| C | -2.2060274694  | 4.2521267978   | 1.8574605951   |
| H | -1.2518097864  | 4.5049096084   | 1.3856590371   |
| H | -2.9223457267  | 5.0686277716   | 1.6800643572   |
| C | - 1.3237016406 | 5.0683356466   | -2.9459610137  |
| H | -2.1317376159  | 5.2377074134   | - 3.6602296591 |
| H | -0.3645230673  | 5.1106418355   | -3.4751248462  |

|   |               |              |               |
|---|---------------|--------------|---------------|
| H | -1.3212116861 | 5.8470054113 | -2.1794616948 |
| C | 1.558016016   | 5.1045925283 | 2.8668912206  |
| H | 0.895637302   | 5.7745881964 | 2.3158732109  |
| H | 2.582539934   | 5.4873590854 | 2.8013764089  |
| H | 1.2914954161  | 5.0840993749 | 3.9279383855  |

**Table S6** Calculated coordinates of trinuclear Zinc(II) cluster-DCNP using B3LYP/ LanL2DZ on Zn, Br, P and 6-31+G (d,p) on C, H, N, O.

0 1

|    | X          | Y          | Z          |
|----|------------|------------|------------|
| Zn | -3.2483198 | 0.03569371 | 1.37242644 |
| Zn | 3.13752053 | -0.4568543 | -1.0323567 |
| Zn | -0.0750242 | -1.2538923 | 0.35697883 |
| Br | -6.2470582 | 3.23476973 | -4.7391408 |
| Br | 6.01637844 | 4.83509359 | 3.50070939 |
| O  | -1.2601847 | 0.45112573 | 1.03690225 |
| O  | 4.17948534 | -0.2363942 | 0.63737722 |
| O  | 1.13999718 | 0.03567963 | -0.9235755 |
| O  | -3.9101693 | 0.62687778 | 3.45517466 |
| H  | -4.3755386 | -0.1355267 | 3.82777616 |
| O  | -4.3691419 | -0.4092202 | -0.2116929 |
| O  | -3.1823389 | -1.7576589 | 2.34005997 |
| O  | 3.85673983 | -0.6085835 | -3.2170403 |
| H  | 4.33649116 | -1.4468642 | -3.2817156 |
| O  | 3.0780769  | -2.4862808 | -1.2524488 |
| O  | 1.25900888 | -2.9512917 | -0.0041301 |
| N  | -3.7835441 | 2.24919162 | 1.21563209 |
| N  | 3.65954026 | 1.69092826 | -1.7167663 |
| O  | -1.3679465 | -2.6678367 | 1.3599365  |
| N  | 1.09915631 | -0.7942273 | 2.17074311 |
| N  | -1.2306856 | -1.5409581 | -1.4939592 |
| O  | 0.38589519 | -2.6565057 | 4.47095958 |
| H  | 0.93083015 | -2.2595303 | 5.16296477 |
| C  | -0.7092198 | 1.59156486 | 1.4435615  |
| C  | 3.87645495 | 1.7490025  | -3.1794569 |
| H  | 4.43379335 | 2.65596755 | -3.4671993 |
| H  | 2.90128817 | 1.78908062 | -3.6674139 |
| C  | -3.9628154 | 2.81610451 | 2.57260576 |
| H  | -4.5244969 | 3.76382199 | 2.534031   |
| H  | -2.9756213 | 3.02999948 | 2.98560215 |

|   |            |            |            |
|---|------------|------------|------------|
| C | -4.8239547 | 0.39177368 | -1.1489506 |
| C | -1.3387934 | 2.84427844 | 1.18622561 |
| C | 0.5862791  | 0.93640306 | -1.7317744 |
| C | -5.066697  | 2.35634035 | 0.46362687 |
| H | -5.3536369 | 3.41953711 | 0.41405176 |
| H | -5.8232721 | 1.84333948 | 1.06864704 |
| C | -0.616397  | 2.89888691 | -3.4528679 |
| C | -1.1895903 | 1.64485734 | -3.2726609 |
| H | -2.1177262 | 1.40499361 | -3.7875427 |
| C | 2.51215021 | 2.54503789 | -1.2774105 |
| H | 2.42789912 | 2.4199847  | -0.1944674 |
| H | 2.74999105 | 3.60445292 | -1.464799  |
| C | 1.20333948 | 2.20223876 | -1.9495103 |
| C | 4.90087044 | 2.06198145 | 0.49258497 |
| C | -0.6268725 | 0.66469143 | -2.4275605 |
| C | 4.63224406 | 0.85476018 | 1.20834747 |
| C | 0.51279923 | 1.60594159 | 2.17623617 |
| C | -2.6650089 | 2.90409353 | 0.46669056 |
| H | -2.9208511 | 3.9566313  | 0.26413318 |
| H | -2.5962342 | 2.39655983 | -0.499116  |
| C | 4.91579473 | 2.08449697 | -1.0172554 |
| H | 5.19651199 | 3.09657596 | -1.353062  |
| H | 5.69501735 | 1.39844069 | -1.3692752 |
| C | -5.7011463 | 2.05550202 | -3.2611596 |
| C | 0.59147054 | 3.14350081 | -2.7791429 |
| H | 1.08008067 | 4.10865156 | -2.9098922 |
| C | -5.5044778 | 2.59097278 | -1.9931049 |
| H | -5.6889368 | 3.64707792 | -1.8176838 |
| C | 1.07747404 | 2.83429536 | 2.5826809  |
| H | 2.01377368 | 2.80921785 | 3.1367461  |
| C | -5.088174  | 1.77763346 | -0.9302039 |
| C | -0.72738   | 4.02971699 | 1.59625851 |
| H | -1.2262542 | 4.97139061 | 1.36885694 |
| C | -5.0897603 | -0.1193468 | -2.4468439 |
| H | -4.9417658 | -1.1826945 | -2.6090336 |
| C | 5.29643364 | 2.01054009 | 3.2808273  |
| H | 5.46841884 | 1.98440768 | 4.35228375 |
| C | -4.6705959 | 1.83981869 | 3.50861031 |
| H | -4.6619348 | 2.24449116 | 4.5281979  |
| H | -5.7053442 | 1.64453343 | 3.21238555 |
| C | 0.49391155 | 4.06121608 | 2.28987334 |

|   |            |            |            |
|---|------------|------------|------------|
| C | 2.23208819 | -3.2824619 | -0.7290925 |
| C | 4.61120314 | 0.51410809 | -3.6897867 |
| H | 4.62674915 | 0.5273421  | -4.7866155 |
| H | 5.64047072 | 0.45136684 | -3.3206544 |
| C | -5.5164811 | 0.69425296 | -3.4940897 |
| H | -5.6967417 | 0.27260663 | -4.4779532 |
| C | 5.30347974 | 3.21352704 | 1.1826887  |
| H | 5.49213291 | 4.12937737 | 0.62948707 |
| C | 4.88153584 | 0.86469635 | 2.60649956 |
| H | 4.73810171 | -0.065407  | 3.14818046 |
| C | -2.3284088 | -2.6912503 | 2.17766335 |
| C | 5.48445519 | 3.18852201 | 2.56088657 |
| C | -1.343465  | -0.6048605 | -2.368454  |
| H | -2.0771274 | -0.7319497 | -3.1728147 |
| C | 1.22916252 | 0.41027526 | 2.60206263 |
| H | 1.98244838 | 0.60515096 | 3.37583595 |
| C | -2.1046667 | -2.7057901 | -1.6645306 |
| H | -2.7117284 | -2.5986315 | -2.5742137 |
| H | -2.7819834 | -2.7418018 | -0.8069861 |
| C | 1.21444112 | -2.9937799 | 3.35473211 |
| H | 0.54620016 | -3.4142299 | 2.60299857 |
| H | 1.95000092 | -3.7617763 | 3.64061298 |
| C | 1.97287673 | -1.8034634 | 2.77051522 |
| H | 2.60112761 | -1.3454393 | 3.55211189 |
| H | 2.64640402 | -2.1727885 | 1.9908627  |
| C | -1.241473  | 3.94233256 | -4.3516009 |
| H | -0.6498875 | 4.0965344  | -5.2632106 |
| H | -1.3153849 | 4.91328047 | -3.8477877 |
| H | -2.2497919 | 3.64959864 | -4.6577157 |
| C | 1.11966806 | 5.36902411 | 2.7199114  |
| H | 2.11819193 | 5.21190729 | 3.13742397 |
| H | 0.51530562 | 5.87395959 | 3.48430553 |
| H | 1.21810236 | 6.06310374 | 1.87687104 |
| O | -0.6348323 | -4.0635199 | -2.9854162 |
| H | 0.0555941  | -4.7343963 | -2.9304469 |
| C | -1.338854  | -4.016889  | -1.7371247 |
| H | -0.651351  | -4.0887581 | -0.8895703 |
| H | -2.0647715 | -4.8428063 | -1.6804019 |
| C | -2.4785382 | -3.9152734 | 3.062595   |
| H | -3.5027065 | -4.0158171 | 3.42724827 |
| H | -1.8067134 | -3.7882578 | 3.92003612 |

|   |            |            |            |
|---|------------|------------|------------|
| H | -2.1709781 | -4.8156373 | 2.52531317 |
| C | 2.47583531 | -4.7657166 | -0.9802577 |
| H | 1.62532602 | -5.3672598 | -0.653877  |
| H | 3.36245506 | -5.0800142 | -0.4179304 |
| H | 2.69006673 | -4.938142  | -2.0392716 |
| P | -8.6638136 | -2.5633079 | 1.45368682 |
| O | -10.094489 | -1.9948719 | 2.03207469 |
| O | -8.7278395 | -2.1262454 | -0.1366974 |
| O | -8.2487327 | -3.9869624 | 1.77146447 |
| C | -11.310515 | -2.7658778 | 1.77763354 |
| H | -11.498965 | -2.7650012 | 0.69982113 |
| H | -11.151038 | -3.7942491 | 2.11440329 |
| C | -7.6680799 | -2.5753037 | -1.0438337 |
| H | -7.5129073 | -3.6473917 | -0.8981468 |
| H | -6.7496859 | -2.0366599 | -0.7878405 |
| C | -8.1230617 | -2.249196  | -2.4518027 |
| H | -7.3500328 | -2.5560001 | -3.1634047 |
| H | -9.0484934 | -2.7780029 | -2.6959874 |
| H | -8.2895915 | -1.1751527 | -2.5647257 |
| C | -12.433421 | -2.0922566 | 2.54067966 |
| H | -13.368247 | -2.6362368 | 2.37158209 |
| H | -12.224257 | -2.0868384 | 3.61345745 |
| H | -12.566436 | -1.0610018 | 2.20403886 |
| C | -7.567612  | -1.288636  | 2.18710871 |
| N | -6.7746471 | -0.5227639 | 2.53602827 |
| P | 9.31055238 | -2.5928506 | -1.5820176 |
| O | 10.1697729 | -1.3109167 | -1.0206051 |
| O | 9.21099578 | -3.5649692 | -0.2477917 |
| O | 9.70652212 | -3.267469  | -2.8819959 |
| C | 11.6211456 | -1.4329558 | -0.8752608 |
| H | 11.8259349 | -2.1837433 | -0.1063669 |
| H | 12.0411291 | -1.7677394 | -1.8280731 |
| C | 8.71361584 | -4.9312314 | -0.396851  |
| H | 9.22940702 | -5.4061103 | -1.235299  |
| H | 7.64128693 | -4.8840961 | -0.6183629 |
| C | 8.9752053  | -5.6456641 | 0.91406808 |
| H | 8.60229822 | -6.6727766 | 0.85055116 |
| H | 10.0459969 | -5.6790757 | 1.13210482 |
| H | 8.46556935 | -5.1420335 | 1.73934108 |
| C | 12.1440162 | -0.0677109 | -0.4769018 |
| H | 13.2300943 | -0.1160701 | -0.3495237 |

|   |            |            |            |
|---|------------|------------|------------|
| H | 11.9177296 | 0.67420302 | -1.2468827 |
| H | 11.6978656 | 0.25877747 | 0.46576365 |
| C | 7.66625346 | -1.7847589 | -1.6573684 |
| N | 6.59857068 | -1.3409073 | -1.7097497 |
